# Supplementary material for: Genome-wide Association Study of Idiopathic Osteonecrosis of the Femoral Head
Source: PubMed Central journal article supplement (PMC5678103; doi:10.1038/s41598-017-14778-y), 2017-11-08
Supplement: 41598_2017_14778_MOESM1_ESM.pdf [file 41598_2017_14778_MOESM1_ESM.pdf]

## SUPPLEMENTARY INFORMATION

### TITLE:

### Genome-wide Association Study of Idiopathic Osteonecrosis of the Femoral Head

Yuma Sakamoto<sup>1,2</sup>, Takuaki Yamamoto<sup>3</sup>, Nobuhiko Sugano<sup>4</sup>, Daisuke Takahashi<sup>5</sup>, Toshiyuki Watanabe<sup>6</sup>, Takashi Atsumi<sup>7</sup>, Junichi Nakamura<sup>8</sup>, Yukiharu Hasegawa<sup>9</sup>, Koichi Akashi<sup>10</sup>, Ichiei Narita<sup>11</sup>, Takeshi Miyamoto<sup>12</sup>, Tsutomu Takeuchi<sup>13</sup>, Katsunori Ikari<sup>14</sup>, Koichi Amano<sup>15</sup>, Atsuhiko Fujie<sup>12</sup>, Toshikazu Kubo<sup>16</sup>, Yoshifumi Tada<sup>17</sup>, Ayumi Kaneuji<sup>18</sup>, Hiroaki Nakamura<sup>19</sup>, Tomoya Miyamura<sup>20</sup>, Tamon Kabata<sup>21</sup>, Ken Yamaji<sup>22</sup>, Takahiro Okawa<sup>23</sup>, Akihiro Sudo<sup>24</sup>, Kenji Ohzono<sup>25</sup>, Yoshiya Tanaka<sup>26</sup>, Yuji Yasunaga<sup>27</sup>, Shuichi Matsuda<sup>28</sup>, Yuuki Imai<sup>29</sup>, Japanese Research Committee on Idiopathic Osteonecrosis of the Femoral Head\*, Masato Akiyama<sup>30</sup>, Michiaki Kubo<sup>31</sup>, Yoichiro Kamatani<sup>30</sup>, Yukihide Iwamoto<sup>32</sup>, Shiro Ikegawa<sup>2</sup>

<sup>1</sup>Department of Orthopaedic Surgery, Graduate School of Medical Sciences, Kyushu University, 3-1-1 Maidashi, Higashi-ku, Fukuoka-city, Fukuoka, 812-8582, Japan

<sup>2</sup>Laboratory for Bone and Joint Diseases, RIKEN Center for Integrative Medical Sciences, 4-6-1 Shirokanedai, Minato-ku, Tokyo, 108-8639, Japan

<sup>3</sup>Department of Orthopaedic Surgery, Faculty of Medicine, Fukuoka University, 7-45-1 Nanakuma, Jonan-ku, Fukuoka-city, Fukuoka, 814-0180, Japan

<sup>4</sup>Department of Orthopaedic Medical Engineering, Osaka University Graduate School of Medicine, 2-2 Yamadaoka, Suita-city, Osaka, 565-0871, Japan

<sup>5</sup>Department of Orthopaedic Surgery, Hokkaido University Graduate School of Medicine, Kita 15, Nishi 7, Kita-ku, Sapporo-city, Hokkaido, 060-8638, Japan

<sup>6</sup>Division of Rheumatology, Endocrinology and Nephrology, Hokkaido University Graduate School of Medicine, Kita 15, Nishi 7, Kita-ku, Sapporo-city, Hokkaido, 060-8638, Japan

<sup>7</sup>Department of Orthopaedic Surgery, Fujiigaoka Hospital, Showa University School of Medicine, 1-30 Fujiigaoka, Aoba-ku, Yokohama-city, Kanagawa, 227-8501, Japan

<sup>8</sup>Department of Orthopaedic Surgery, Graduate School of Medicine, Chiba University, 1-8-1 Inohana, Chuo-ku, Chiba-city, Chiba, 260-8677, Japan

<sup>9</sup>Department of Orthopaedic Surgery, Nagoya University Graduate School of Medicine, 65 Tsurumai-cho, Showa-ku, Nagoya-city, Aichi, 466-8550, Japan

<sup>10</sup>Department of Medicine and Biosystemic Science, Kyushu University Graduate School of Medical Sciences, 3-1-1 Maidashi, Higashi-ku, Fukuoka-city, Fukuoka, 812-8582, Japan

<sup>11</sup>Division of Clinical Nephrology and Rheumatology, Kidney Research Center, Niigata University Graduate School of Medical and Dental Sciences, 1-757 Chuo-ku, Niigata-city, Niigata, 951-8510, Japan

<sup>12</sup>Department of Orthopedic Surgery, Keio University School of Medicine, 35 Shinano-machi, Shinjuku-ku, Tokyo, 160-8582, Japan

- <sup>13</sup>Division of Rheumatology, Department of Internal Medicine, Keio University School of Medicine, 35 Shinano-machi, Shinjuku-ku, Tokyo, 160-8582, Japan
- <sup>14</sup>Institute of Rheumatology, Tokyo Women's Medical University, 10-22 Kawada-cho, Shinjuku-ku, Tokyo, 162-0054, Japan
- <sup>15</sup>Department of Rheumatology and Clinical Immunology, Saitama Medical Center, Saitama Medical University, 1981 Kamoda, Kawagoe-city, Saitama, 350-8550, Japan
- <sup>16</sup>Department of Orthopaedics, Graduate School of Medical Science, Kyoto Prefectural University of Medicine, 465 Kajii-cho, Kawaramachi-Hirokoji, Kamigyo-ku, Kyoto-city, Kyoto, 602-8566, Japan
- <sup>17</sup>Department of Rheumatology, Faculty of Medicine, Saga University, 5-1-1 Nabeshima, Saga-city, Saga, 849-8501, Japan
- <sup>18</sup>Department of Orthopaedic Surgery, Kanazawa Medical University, 1-1 Daigaku, Uchinada-machi, Kahoku-gun, Ishikawa, 920-0293, Japan
- <sup>19</sup>Department of Orthopaedic Surgery, Osaka City University Graduate School of Medicine, 1-4-3, Asahi-machi, Abeno-ku, Osaka-city, Osaka, 545-8585, Japan
- <sup>20</sup>Department of Internal Medicine and Rheumatology, National Hospital Organization Kyushu Medical Center, 1-8-1 Jigyohama, Chuo-ku, Fukuoka-city, Fukuoka, 810-8563, Japan
- <sup>21</sup>Department of Orthopaedic Surgery, Graduate School of Medical Science, Kanazawa University, Takara-machi 13-1, Kanazawa-city, Ishikawa, 920-8641, Japan
- <sup>22</sup>Department of Internal Medicine and Rheumatology, Juntendo University School of Medicine, 2-1-1 Hongo, Bunkyo-ku, Tokyo, 113-8421, Japan
- <sup>23</sup>Department of Orthopaedic Surgery, Kurume University Medical Center, 155-1 Kokubu-machi, Kurume-city, Fukuoka, 839-0863, Japan
- <sup>24</sup>Department of Orthopaedic Surgery, Mie University Graduate School of Medicine, 2-174 Edobashi, Tsu-city, Mie, 514-8507, Japan
- <sup>25</sup>Department of Orthopaedic Surgery, Kansai Rosai Hospital, 1-69 Inabasou 3-chome, Amagasaki-city, Hyogo, 660-8511, Japan
- <sup>26</sup>The First Department of Internal Medicine, University of Occupational and Environmental Health, School of Medicine, 1-1 Iseigaoka, Yahatanishi-ku, Kitakyushu-city, Fukuoka, 807-8555, Japan
- <sup>27</sup>Department of Orthopaedic Surgery, Hiroshima Prefectural Rehabilitation Center, Taguchi 295-3, Saijo-cho, Higashi-Hiroshima-city, Hiroshima, 739-0036, Japan
- <sup>28</sup>Department of Orthopaedic Surgery, Graduate School of Medicine, Kyoto University, 54 Kawahara-cho, Shogoin, Sakyo-ku, Kyoto-city, Kyoto, 606-8507, Japan
- <sup>29</sup>Division of Integrative Pathophysiology, Proteo-Science Center, Ehime University Graduate School of Medicine, Shitsukawa, Toon-city, Ehime, 791-0295, Japan
- <sup>30</sup>Laboratory for Statistical Analysis, RIKEN Center for Integrative Medical Sciences, 1-7-22 Suehiro-cho, Tsurumi-ku, Yokohama-city, Kanagawa, 230-0045, Japan
- <sup>31</sup>RIKEN Center for Integrative Medical Sciences, 1-7-22 Suehiro-cho, Tsurumi-ku, Yokohama-city, Kanagawa, 230-0045, Japan
- <sup>32</sup>Department of Orthopaedic Surgery, Kyushu Rosai Hospital, 1-1 Sonekita-machi, Kokuraminami-ku, Kitakyushu-city, Fukuoka, 800-0229, Japan

### Supplemental Figure 1. Principal component analysis of GWAS samples with HAPMAP four populations

Scatter plots of (a) principal component 1 (PC1) and PC2, (b) PC1 and PC3, (c) PC2 and PC3. In total, there were four outliers in patients with idiopathic osteonecrosis of the femoral head (IONFH), who deviated from East Asia cluster (red box). Four HAPMAP3 populations (JPT, CHB, CEU, YRI) were referred and each group was plotted in different color. BBJ: BioBank Japan, JPT: Japanese in Tokyo (Japan), CHB: Han Chinese in Beijing (China), CEU: Utah residents with Northern and Western European ancestry from the CEPH collection, YRI: Yoruba in Ibadan (Nigeria).

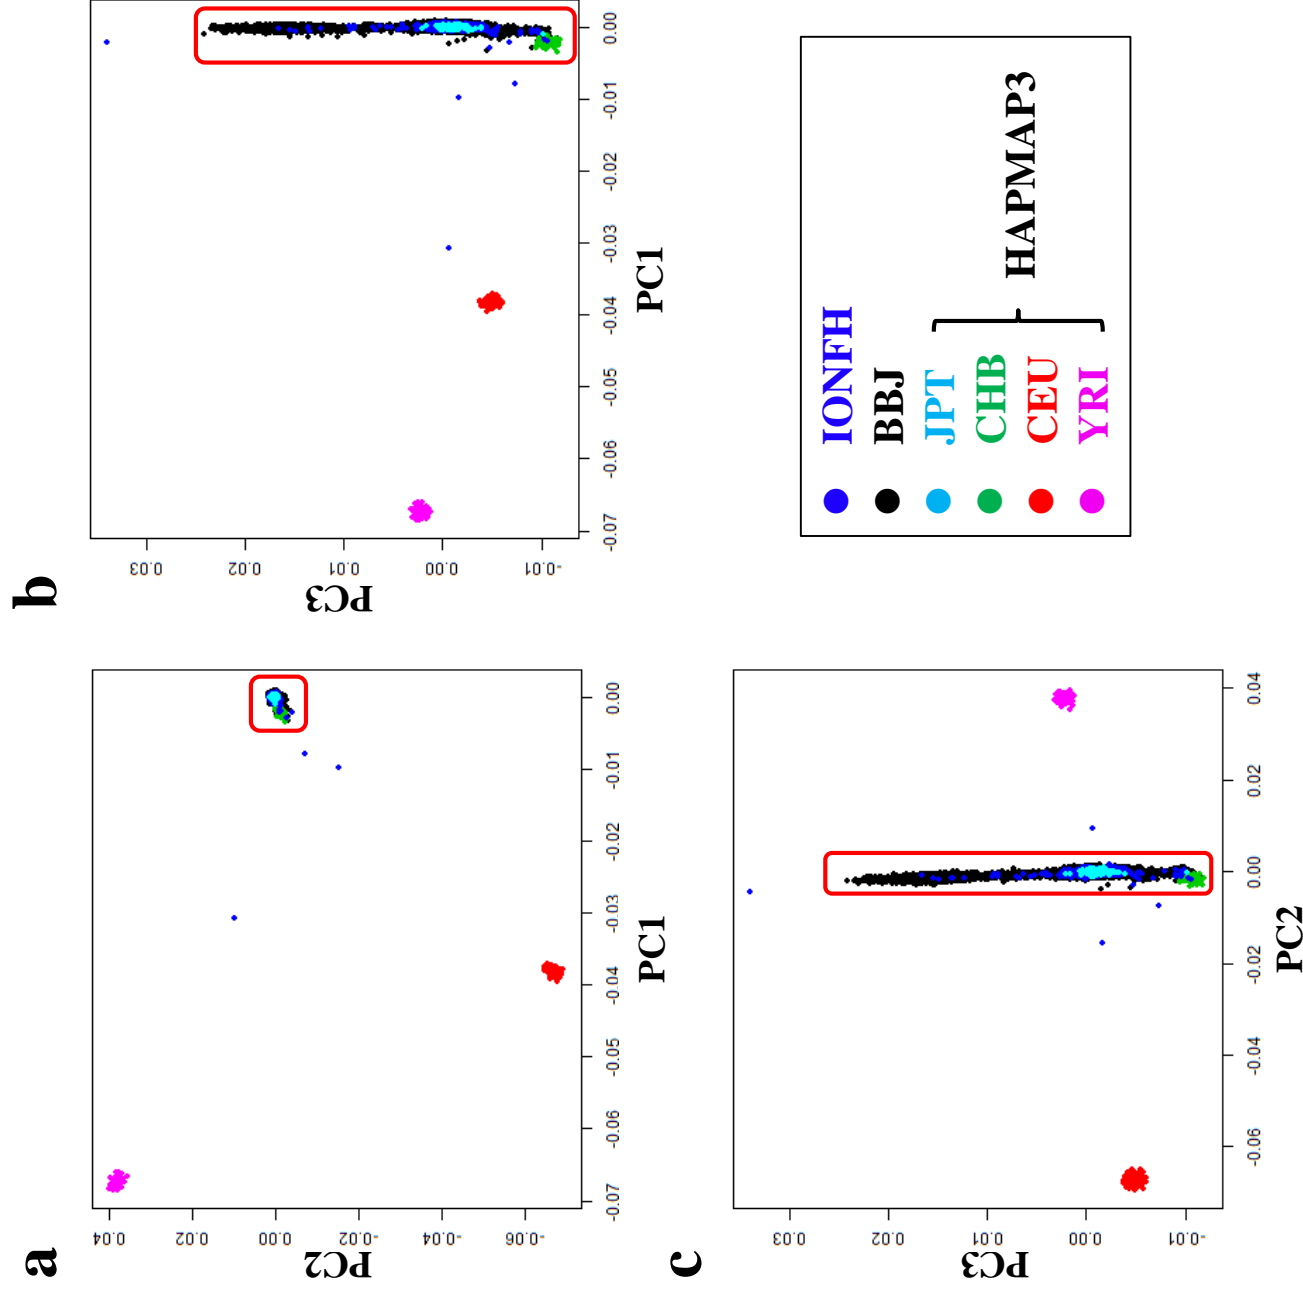

**Supplemental Figure 2. Quantile-Quantile plots of genotyped data**

(a) Idiopathic osteonecrosis of the femoral head vs BioBank Japan (BBJ), (b) Alcohol-associated osteonecrosis of the femoral head (ONFH) vs BBJ, (c) Alcohol-associated ONFH vs BBJ of heavy drinker (400 ml/day or more ethanol consumption), (d) Steroid-associated ONFH vs BBJ, and (e) Neither-associated ONFH vs BBJ. Lambda GCs were (a) 1.077, (b) 1.039, (c) 1.043, (d) 1.047, and (e) 1.002, respectively.

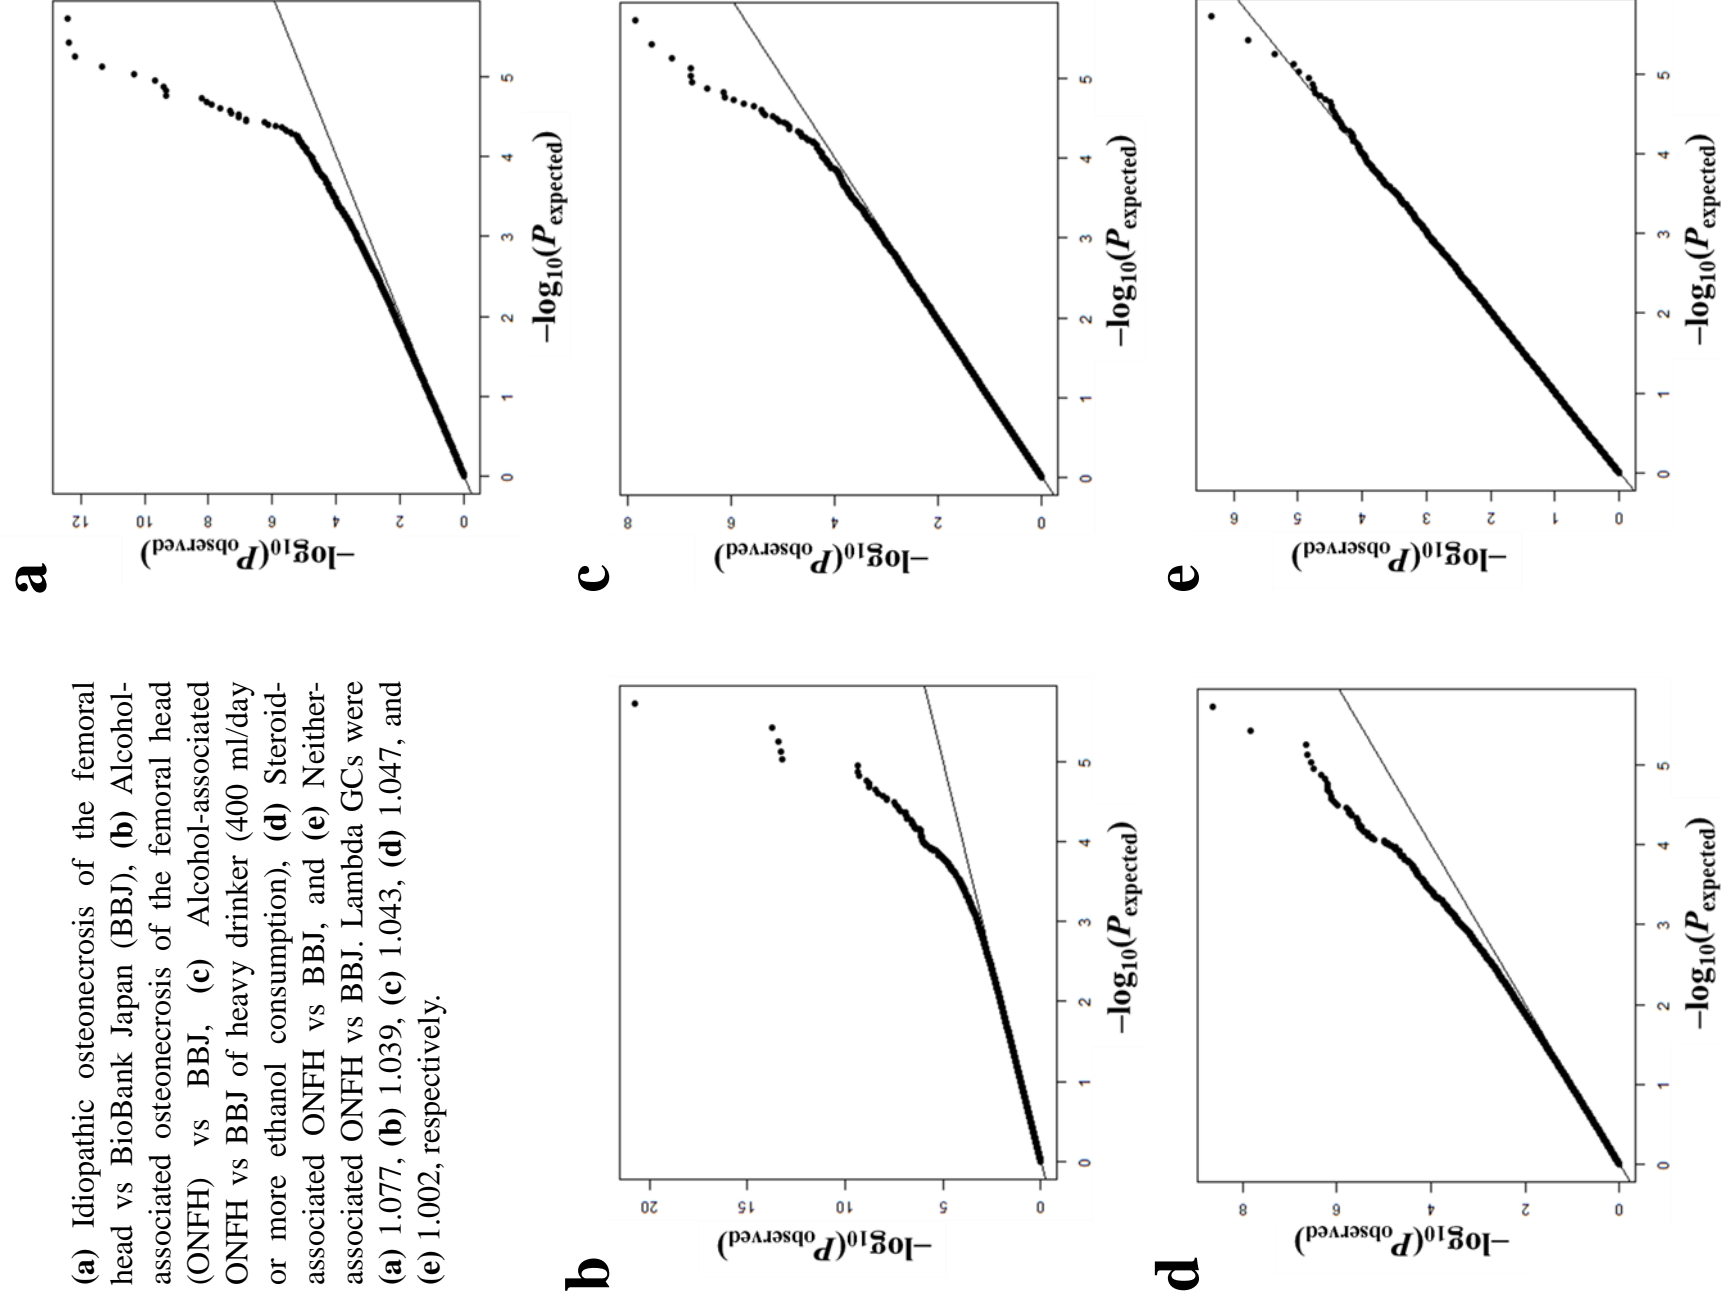

### Supplemental Figure 3. Manhattan plots of genotyped data

(a) Idiopathic osteonecrosis of the femoral head vs BioBank Japan (BBJ), (b) Alcohol-associated osteonecrosis of the femoral head (ONFH) vs BBJ, (c) Alcohol-associated ONFH vs BBJ of heavy drinker (400 ml/day or more ethanol consumption), (d) Steroid-associated ONFH vs BBJ, and (e) Neither-associated ONFH vs BBJ. The SNPs with genome-wide significance were identified in (a) 12q24.11-12, (b) 12q24.11-13 and 20q12, (c) 20q12, and (d) 2q32.3. The red and blue line represented the threshold of genome-wide significance ( $P = 5 \times 10^{-8}$ ) and suggestive association threshold ( $P = 1 \times 10^{-5}$ ), respectively.

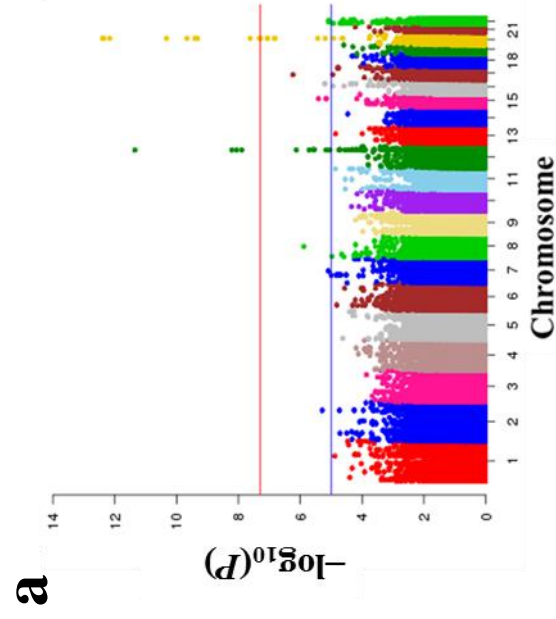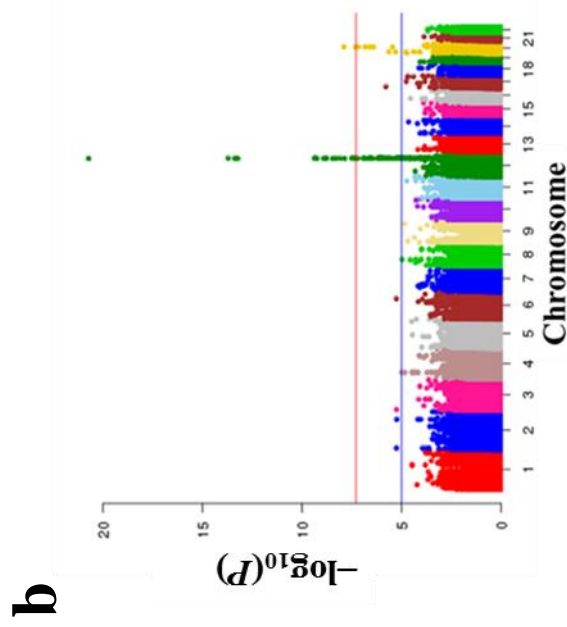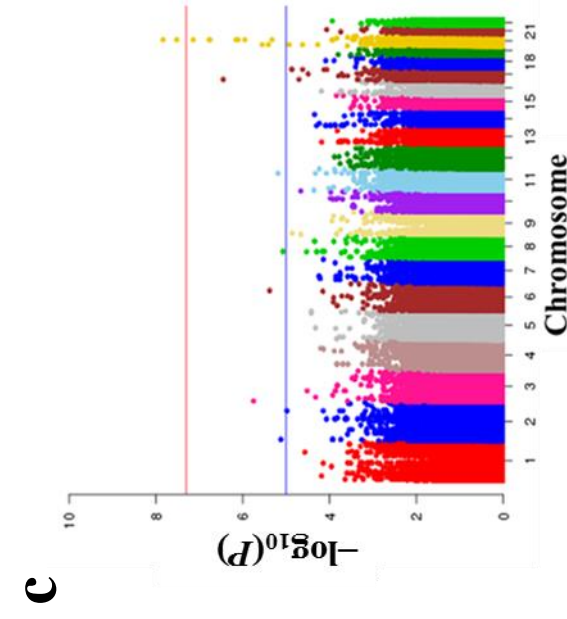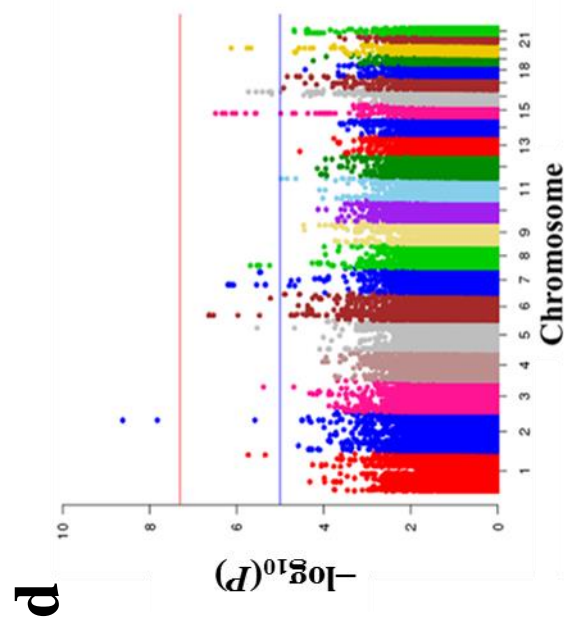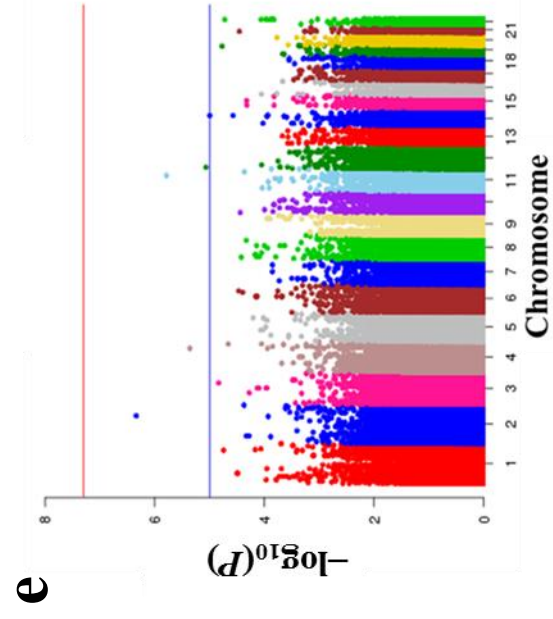

**Supplemental Figure 4. Quantile-Quantile plots of imputed data**

(a) Idiopathic osteonecrosis of the femoral head vs BioBank Japan (BBJ), (b) Alcohol-associated osteonecrosis of the femoral head (ONFH) vs BBJ, (c) Alcohol-associated ONFH vs BBJ of heavy drinker (400 ml/day or more ethanol consumption), (d) Steroid-associated ONFH vs BBJ, and (e) Neither-associated ONFH vs BBJ. Lambda GCs were (a) 1.083, (b) 1.048, (c) 1.052, (d) 1.041, and (e) 1.006, respectively.

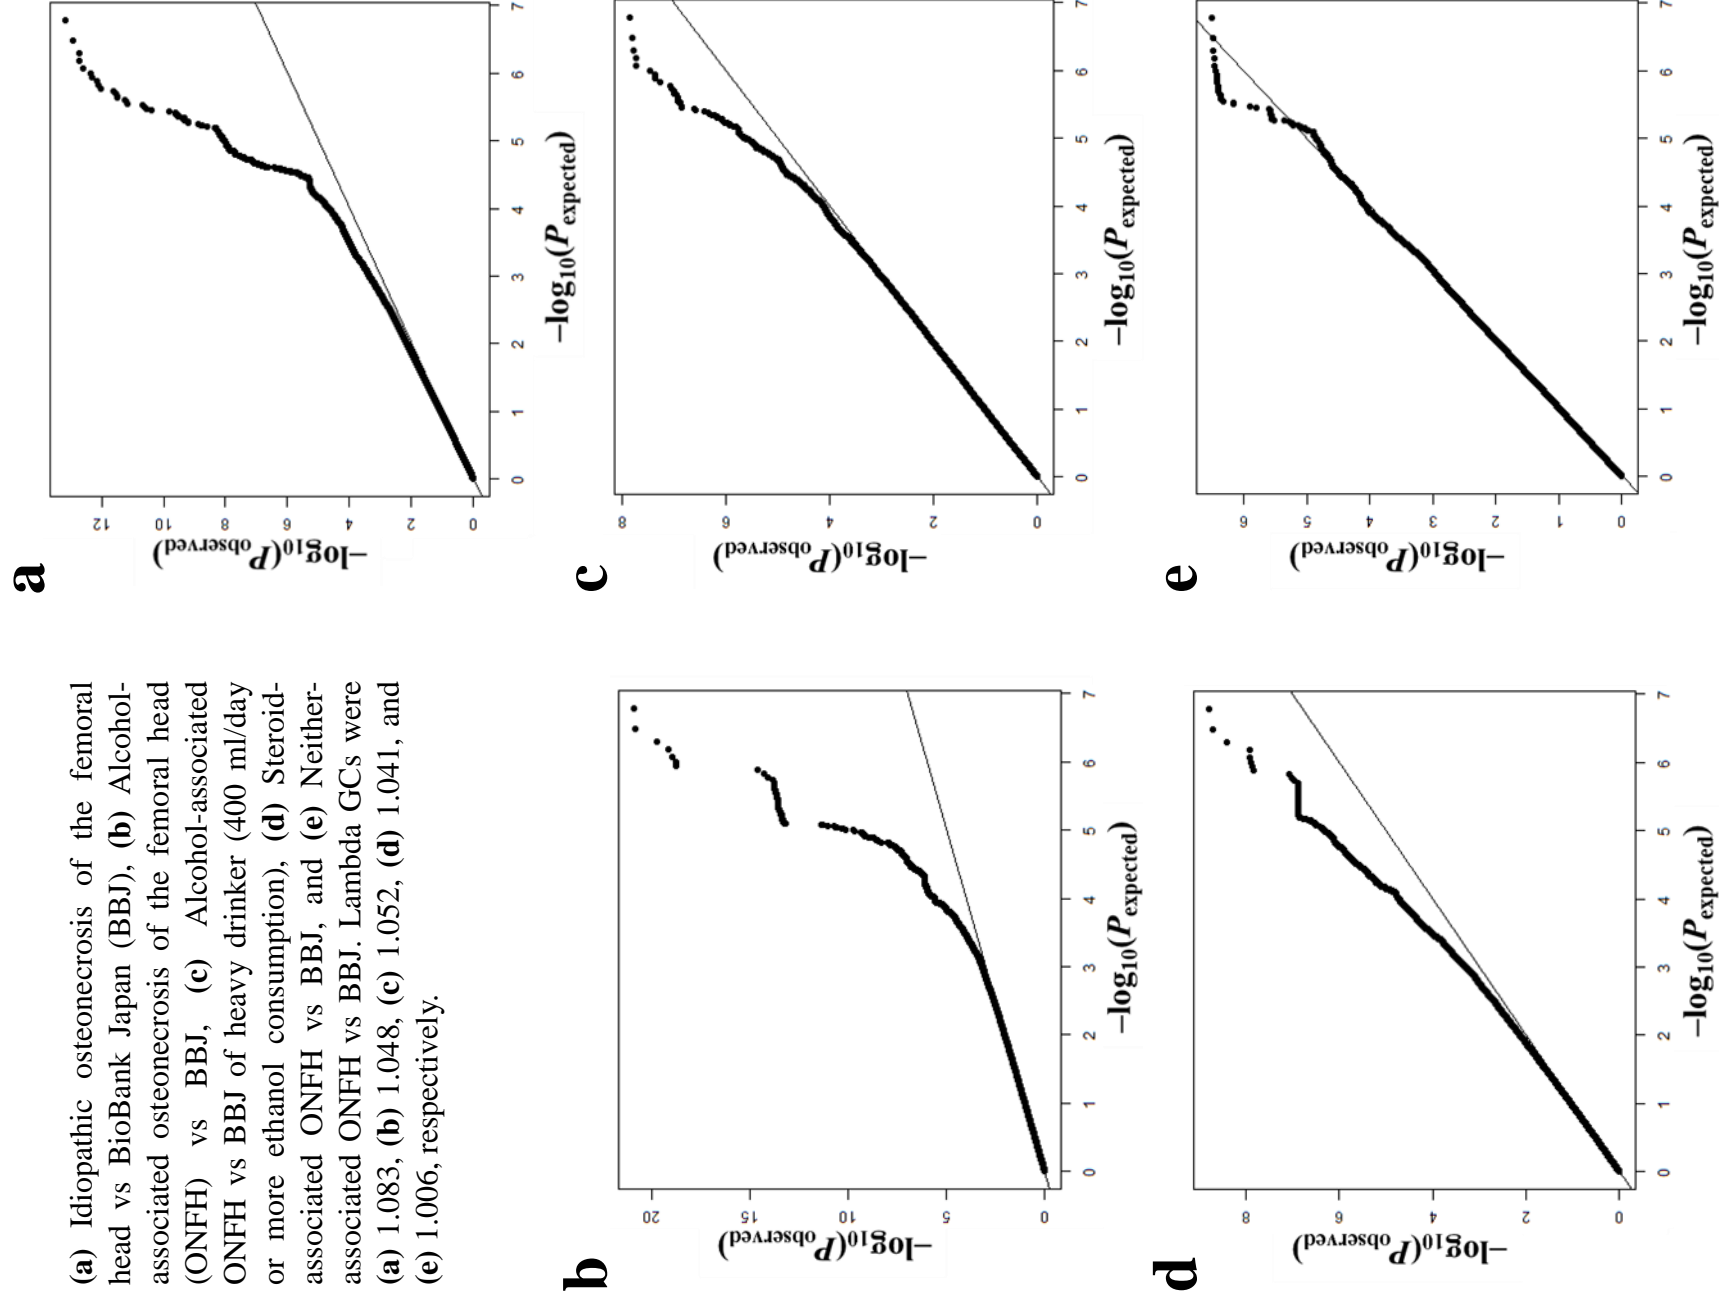

**Supplemental Figure 5. Regional association plots of the 2q32.3 locus on the analysis for steroid-associated osteonecrosis of the femoral head**

(a) genotyped and (b) imputed SNPs. The red line represented the threshold of genome-wide significance ( $P = 5 \times 10^{-8}$ ). The color intensity reflected the extent of linkage disequilibrium index ( $r^2$ ) with the most strongly associated SNP (in purple). Estimated recombination rates from the hg19/1000 Genomes Project Nov 2014 East Asian reference were shown as light-blue lines.

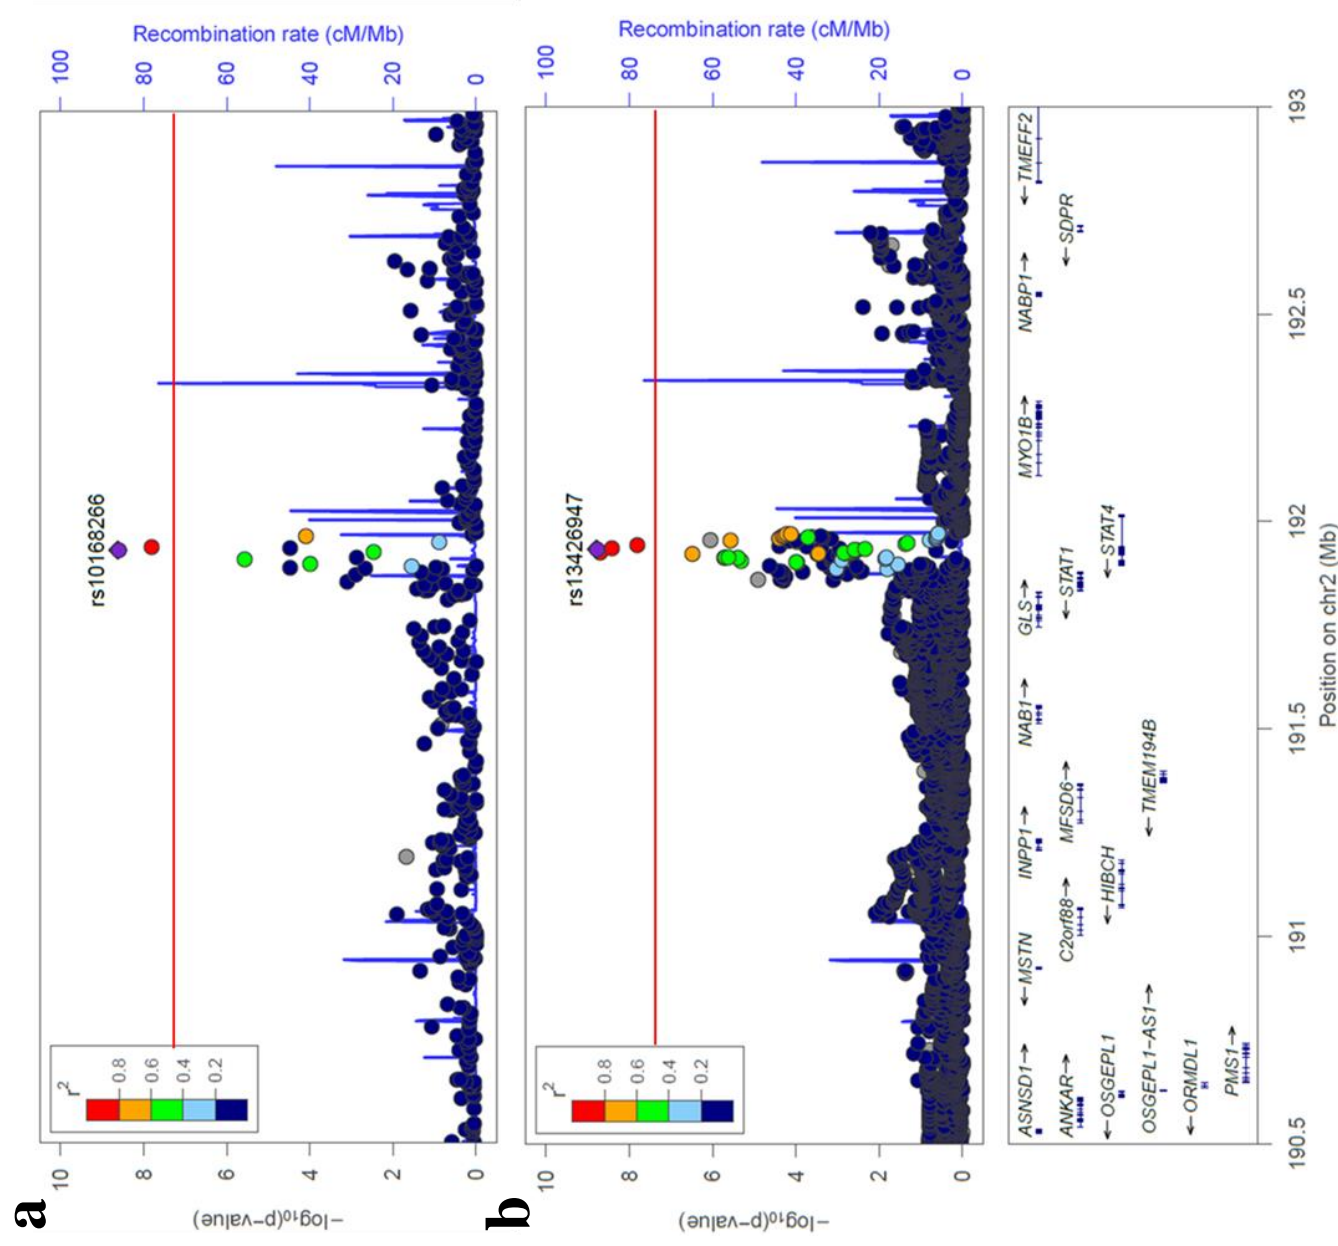

## Supplemental Figure 6. Regional association plot of the 6p21.32 locus for steroid-associated osteonecrosis of the femoral head

Four genome-wide significant SNPs including rs92689786 and rs142354442 were located in the major histocompatibility complex region. When adjusting for rs9268978, the genome-wide significance in this locus disappeared (data not shown). The red line represented the threshold of genome-wide significance ( $P = 5 \times 10^{-8}$ ). The color intensity reflected the extent of linkage disequilibrium index ( $r^2$ ) with rs9268978 (in purple). Estimated recombination rates from the hg19/1000 Genomes Project Nov 2014 East Asian reference were shown as light-blue lines.

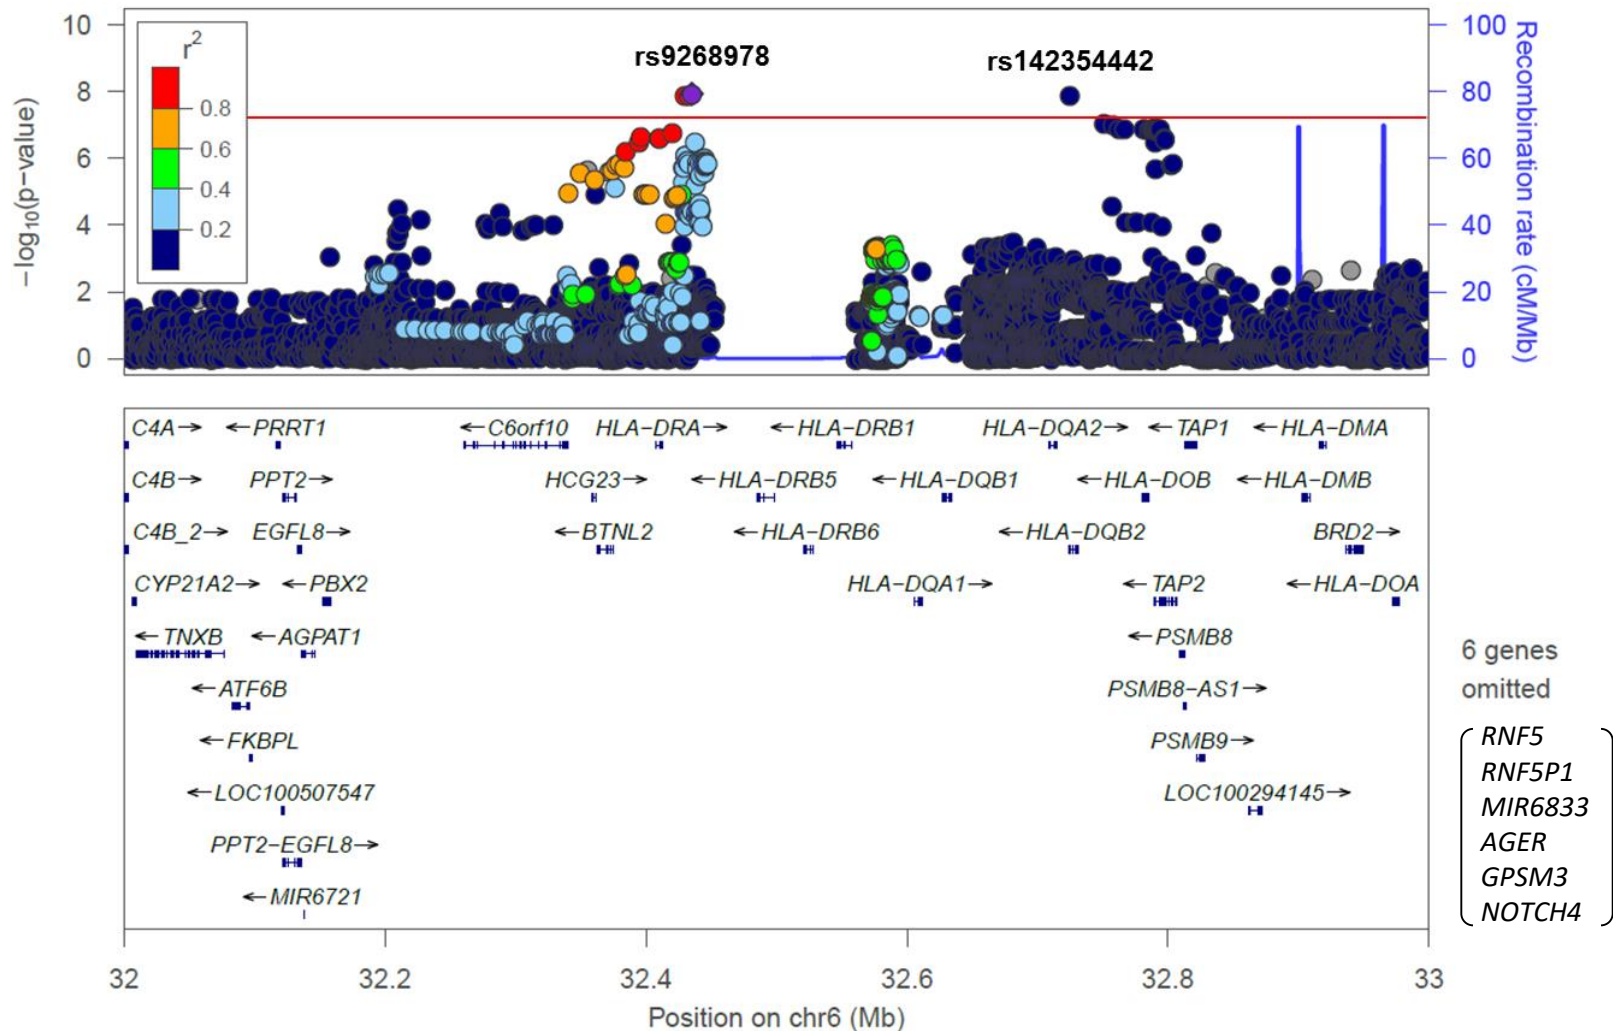



### Supplemental Figure 7. Regional association plot of the 12q24 locus for idiopathic osteonecrosis of the femoral head

rs3858704 was the top SNP in this locus ( $P = 2.97 \times 10^{-12}$ ). The red line represented the threshold of genome-wide significance ( $P = 5 \times 10^{-8}$ ). The color intensity reflected the extent of linkage disequilibrium index ( $r^2$ ) with rs3858704 (in purple). Estimated recombination rates from the hg19/1000 Genomes Project Nov 2014 East Asian reference were shown as light-blue lines.

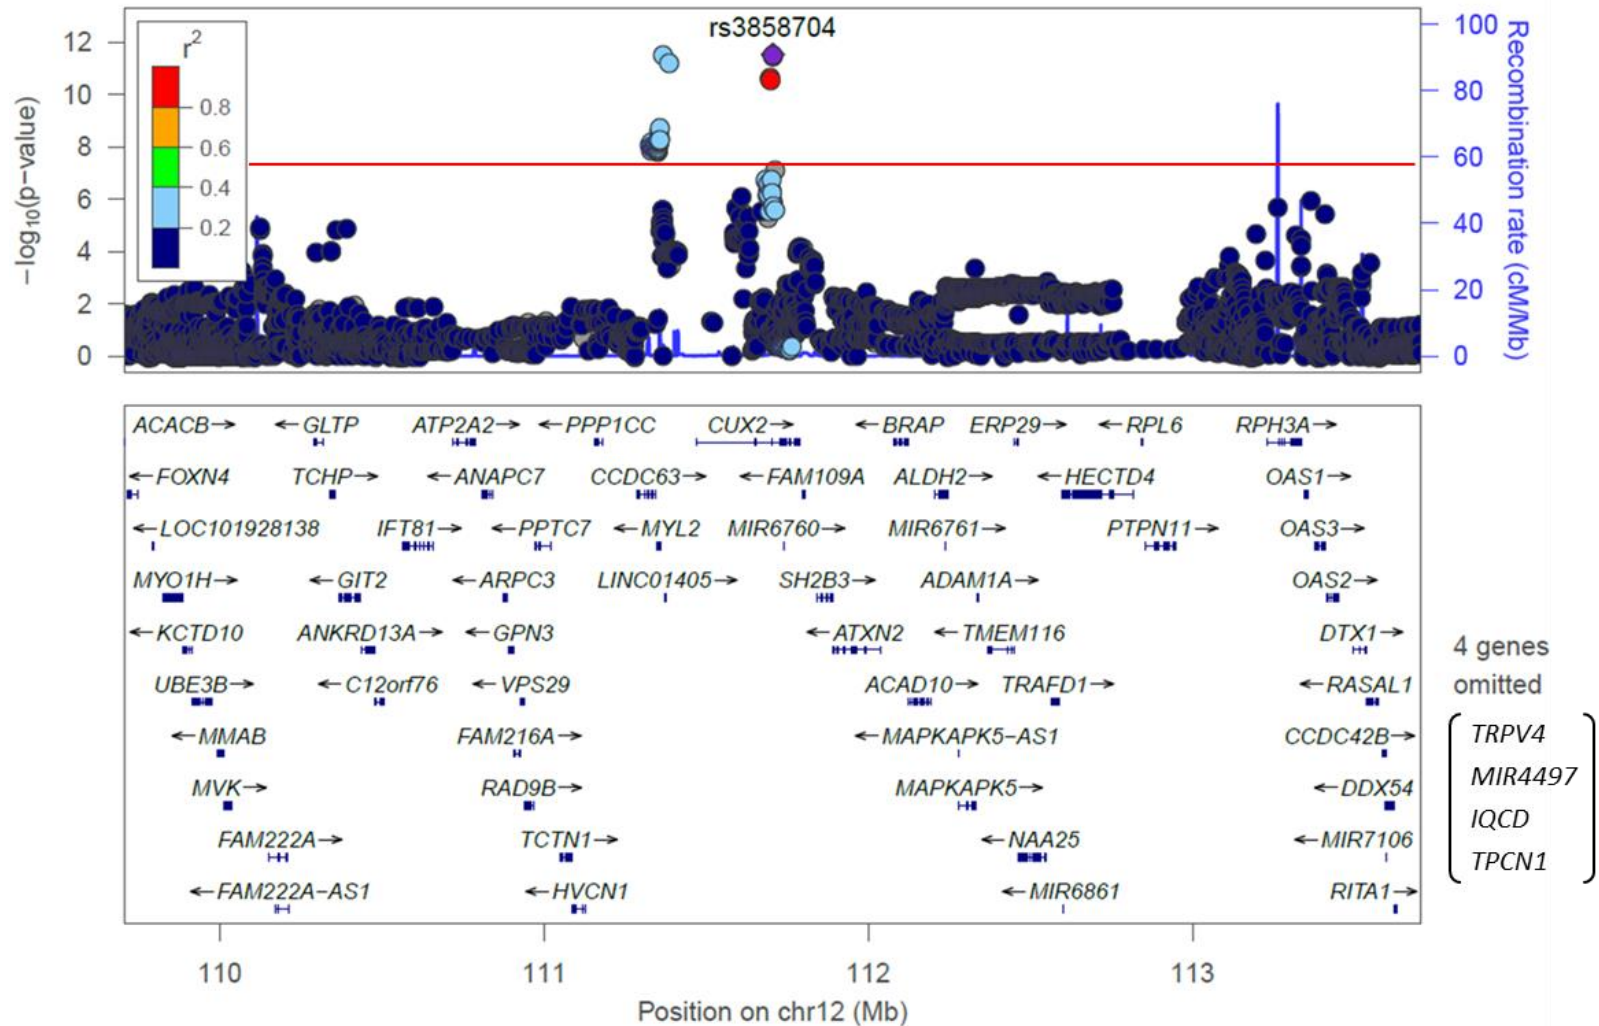

## Supplemental Figure 8. Regional association plots of the 12q24 locus for each stratified analysis

(a) Alcohol-associated osteonecrosis of the femoral head (ONFH) vs BioBank Japan (BBJ), (b) Alcohol-associated ONFH vs BBJ of heavy drinker (400 ml/day or more ethanol consumption), (c) Steroid-associated ONFH vs BBJ, and (d) Neither-associated ONFH vs BBJ. (a) A strong association was found on Alcohol-associated ONFH. (b) When the case and control were matched by alcohol intake, the association on Alcohol-associated ONFH disappeared. (c, d) The association was not recognized on Steroid-associated or Neither-associated ONFH. The red line represented the threshold of genome-wide significance ( $P = 5 \times 10^{-8}$ ). The color intensity reflected the extent of linkage disequilibrium index ( $r^2$ ) with rs3858704 (in purple). Estimated recombination rates from the hg19/1000 Genomes Project Nov 2014 East Asian reference were shown as light-blue lines.

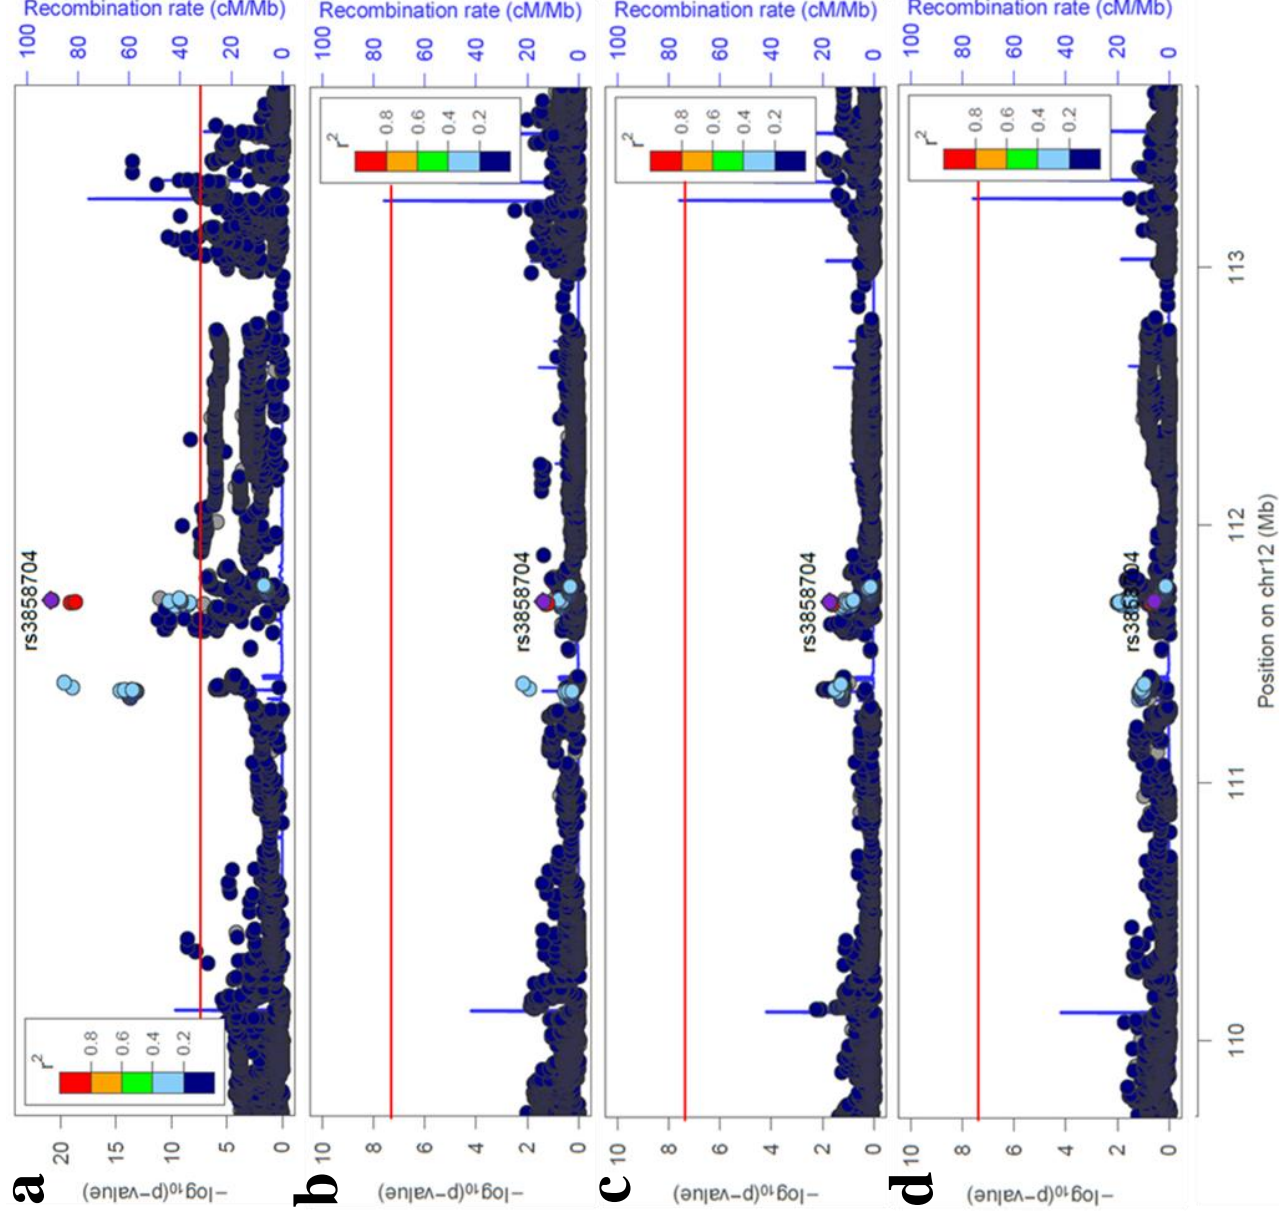

### Supplemental Figure 9. Conditional analysis of the 20q12 locus for idiopathic osteonecrosis of the femoral head

The regional association plots (a) before and (b) after adjusting for rs6028718. (a) rs6028718 showed the most significant association ( $P = 7.05 \times 10^{-14}$ ). (b) No SNP maintained genome-wide significance (red line:  $P = 5 \times 10^{-8}$ ) when adjusting for rs6028718. The color intensity reflected the extent of linkage disequilibrium index ( $r^2$ ) with rs6028718 (in purple). Estimated recombination rates from the hg19/1000 Genomes Project Nov 2014 East Asian reference were shown as light-blue lines.

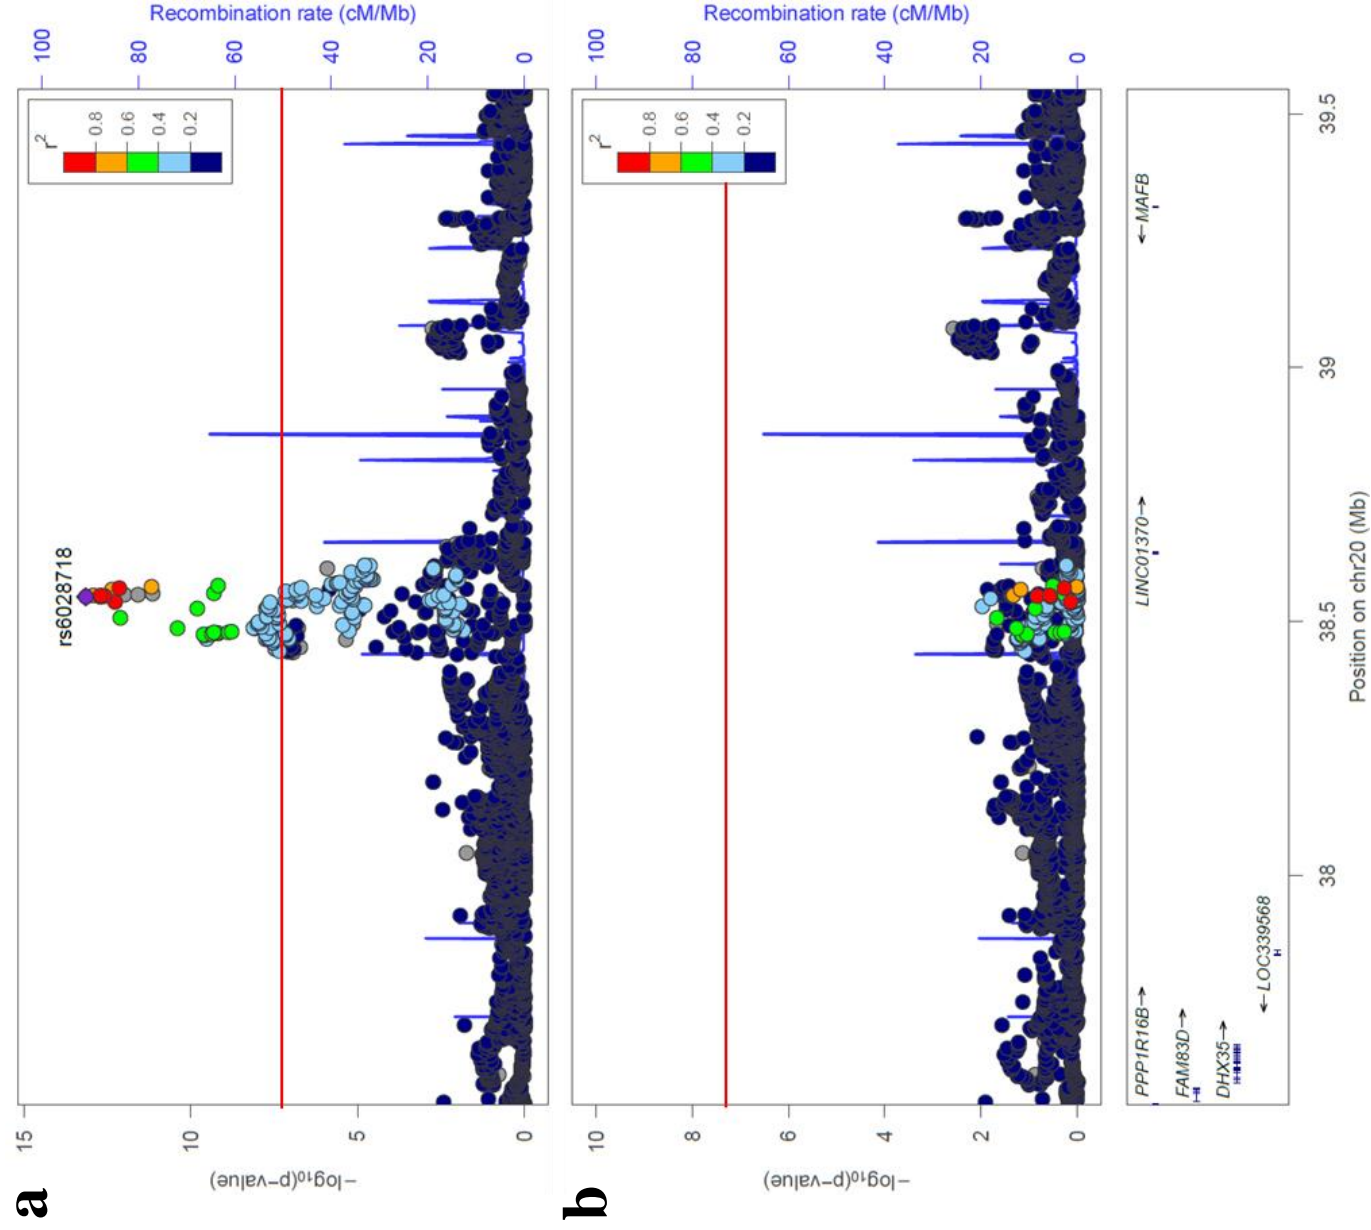

## Supplemental Figure 10. Regional association plots of the 20q12 locus for each stratified analysis

(a) Alcohol-associated osteonecrosis of the femoral head (ONFH) vs BioBank Japan (BBJ), (b) Alcohol-associated ONFH vs BBJ of heavy drinker (400 ml/day or more ethanol consumption), (c) Steroid-associated ONFH vs BBJ, and (d) Neither-associated ONFH vs BBJ. (a) The genome-wide significant association (red line:  $P = 5 \times 10^{-8}$ ) was found on Alcohol-associated ONFH. (b) This association was still significant when case-control was matched by alcohol intake. (c) Although not significant, strong association was observed on Steroid-associated ONFH. (d) On Neither-associated ONFH, SNPs in this locus satisfied at least nominal  $P$  value ( $P < 0.05$ ). The color intensity reflected the extent of linkage disequilibrium index ( $r^2$ ) with rs6028718 (in purple). Estimated recombination rates from the hg19/1000 Genomes Project Nov 2014 East Asian reference were shown as light-blue lines.

a

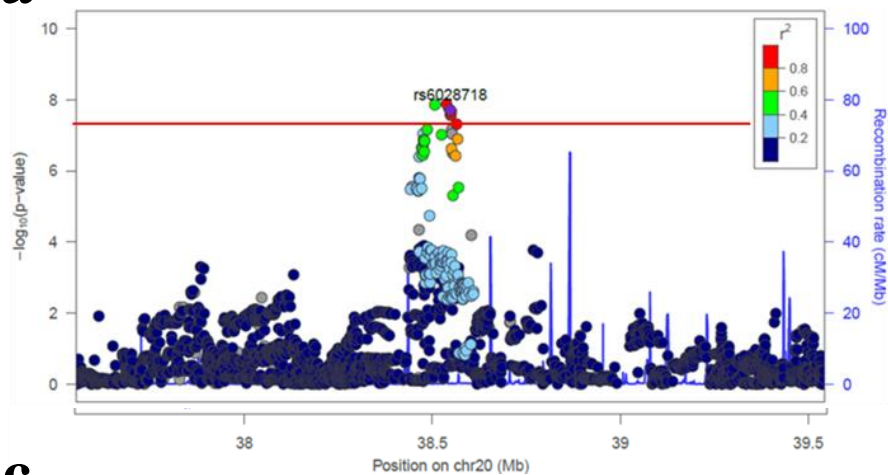

b

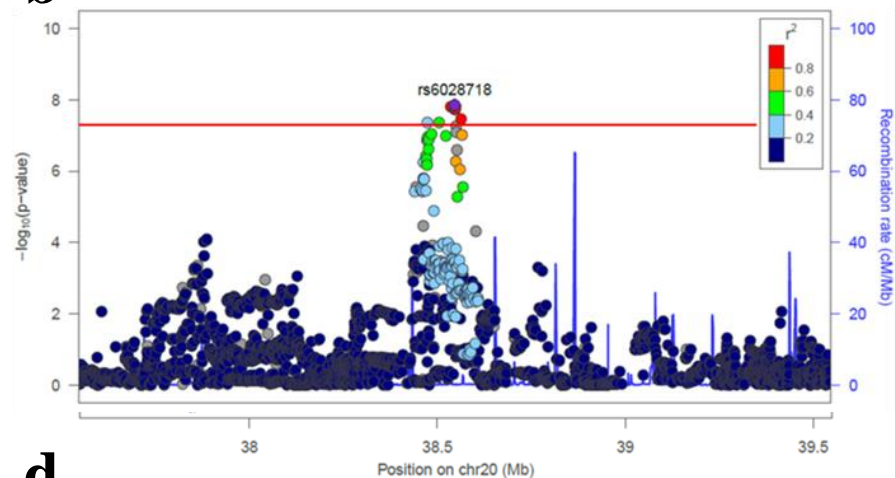

c

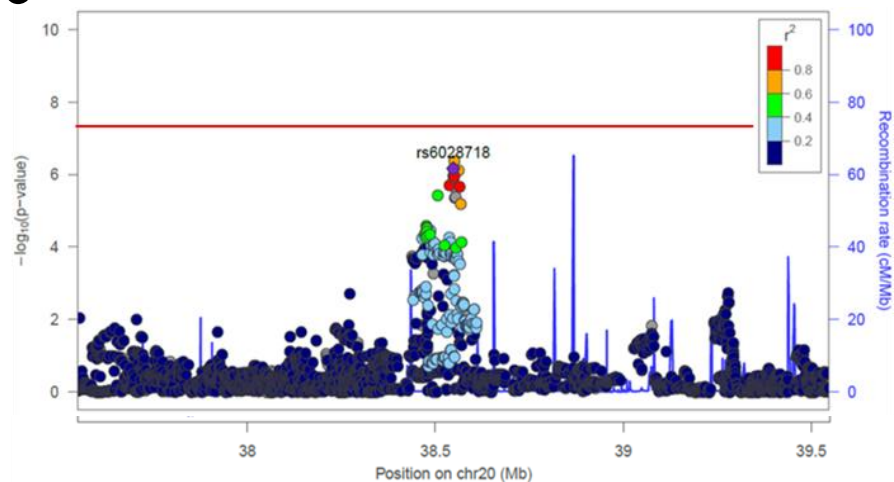

d

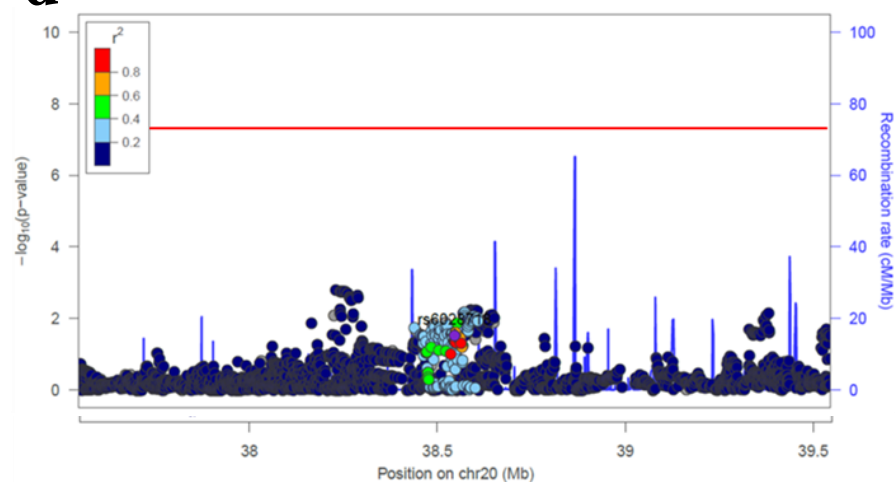

### Supplemental Figure 11. Effect size of rs6028718 in each GWAS

Forest plot showing OR and 95% CI of rs6028718 in each GWAS. Box and horizontal line indicate mean OR and 95% CI, respectively. IONFH: idiopathic osteonecrosis of the femoral head, OR: odds ratio, CI: confidence interval. \*Controls were matched for alcohol-drinking history (400 ml or more ethanol consumption per week).

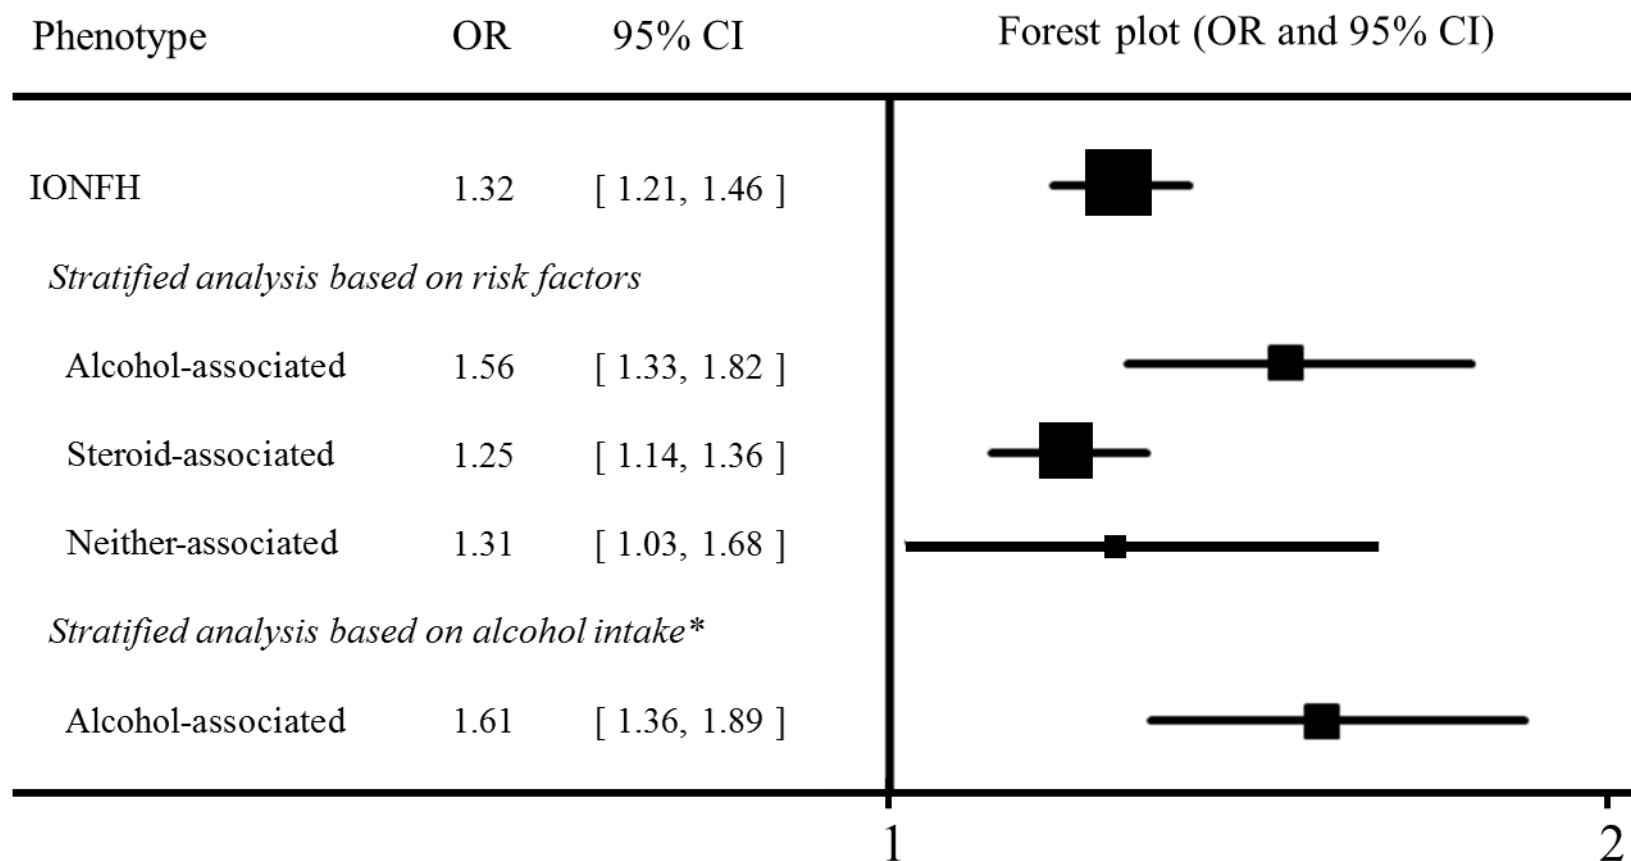

## Supplemental Figure 12. Linkage disequilibrium in the 20q12 locus for idiopathic osteonecrosis of the femoral head

The yellow-colored region shows the 20q12 disease-susceptibility locus, containing significantly associated SNPs and surrounded by distinct peaks of recombination rate ( $> 20$  cM/Mb). There were no SNPs in strong linkage disequilibrium with lead GWAS SNP in genic regions around the locus. The red line represented the threshold of genome-wide significance ( $P = 5 \times 10^{-8}$ ). The color intensity reflected the extent of linkage disequilibrium index ( $r^2$ ) with rs6028718 (in purple). Estimated recombination rates from the hg19/1000 Genomes Project Nov 2014 East Asian reference were shown as light-blue lines.

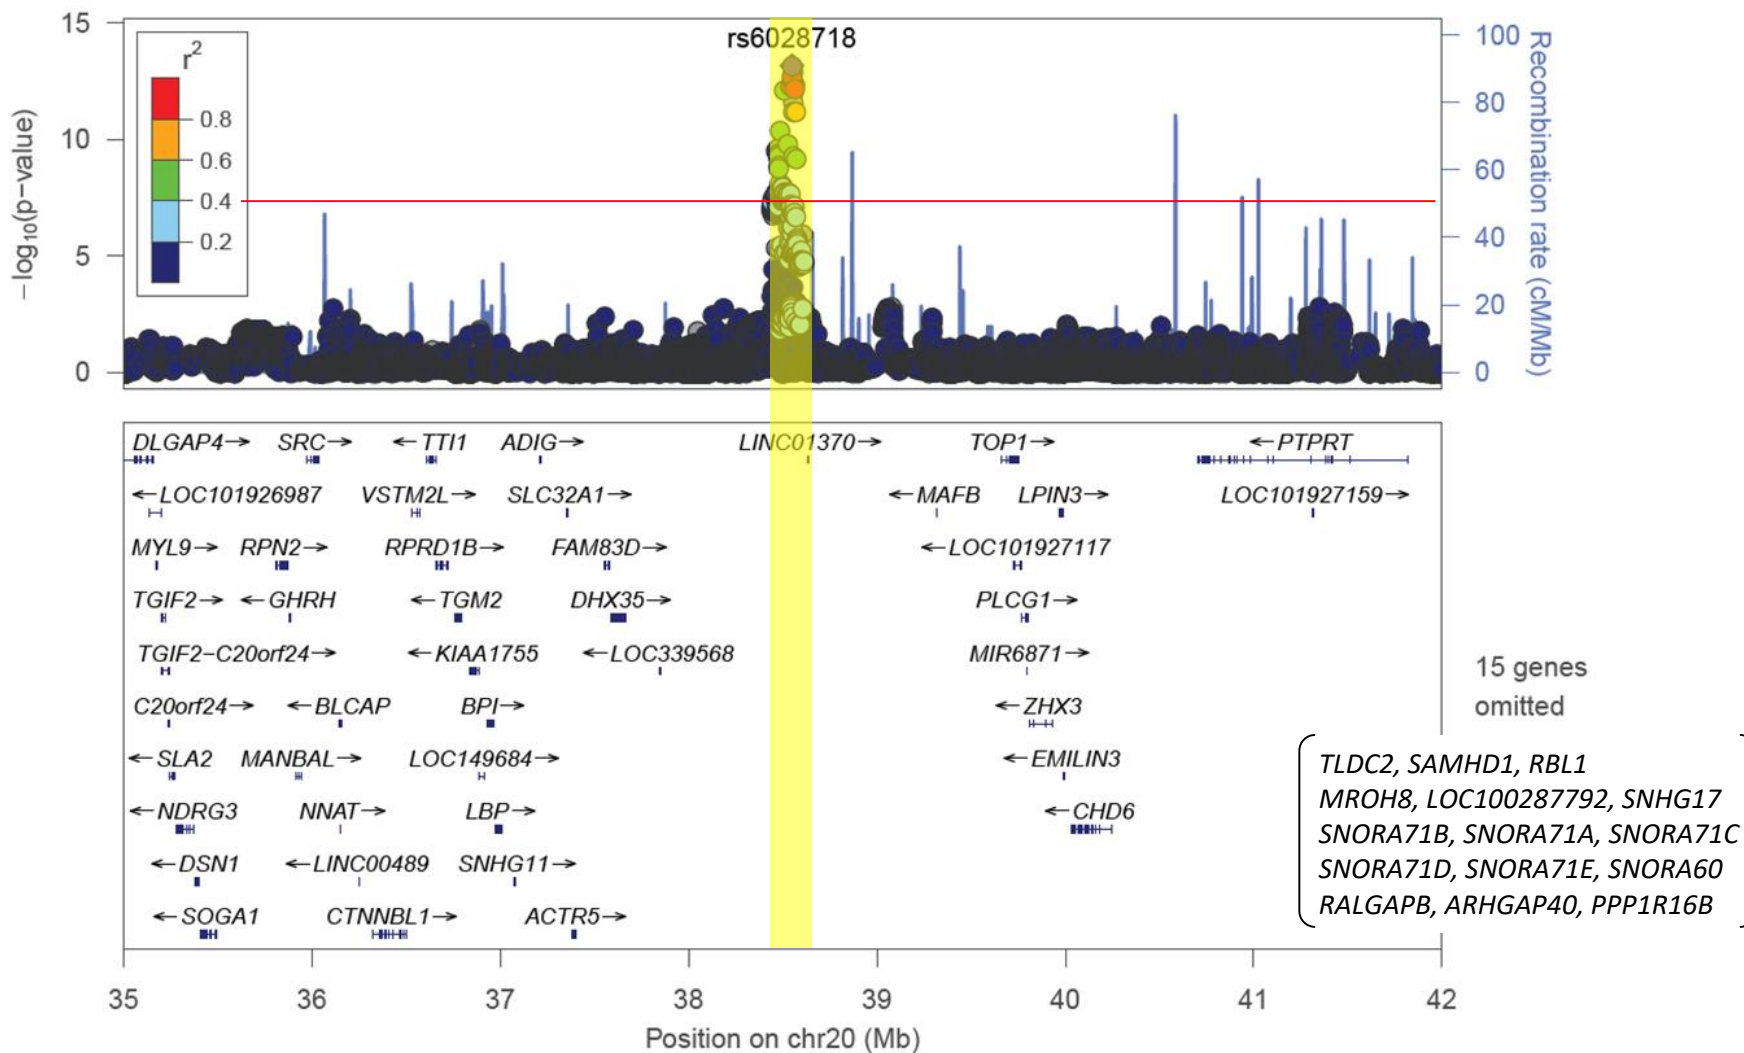

**Supplemental Figure 13. Box plots of top 4 eQTL combinations of candidate genes, genome-wide significant SNPs, and tissues available in GTEx**

Top 4 eQTL combinations were composed of *LINC01370*, liver, and (a) rs62212405 ( $P_{\text{eQTL}} = 0.00018$ ), (b) rs2208649 ( $P_{\text{eQTL}} = 0.00024$ ), (c) rs2224539 ( $P_{\text{eQTL}} = 0.00049$ ), and (d) rs2145943 ( $P_{\text{eQTL}} = 0.0011$ ). Data were obtained from GTEx (accessed 2017 Feb. 21).

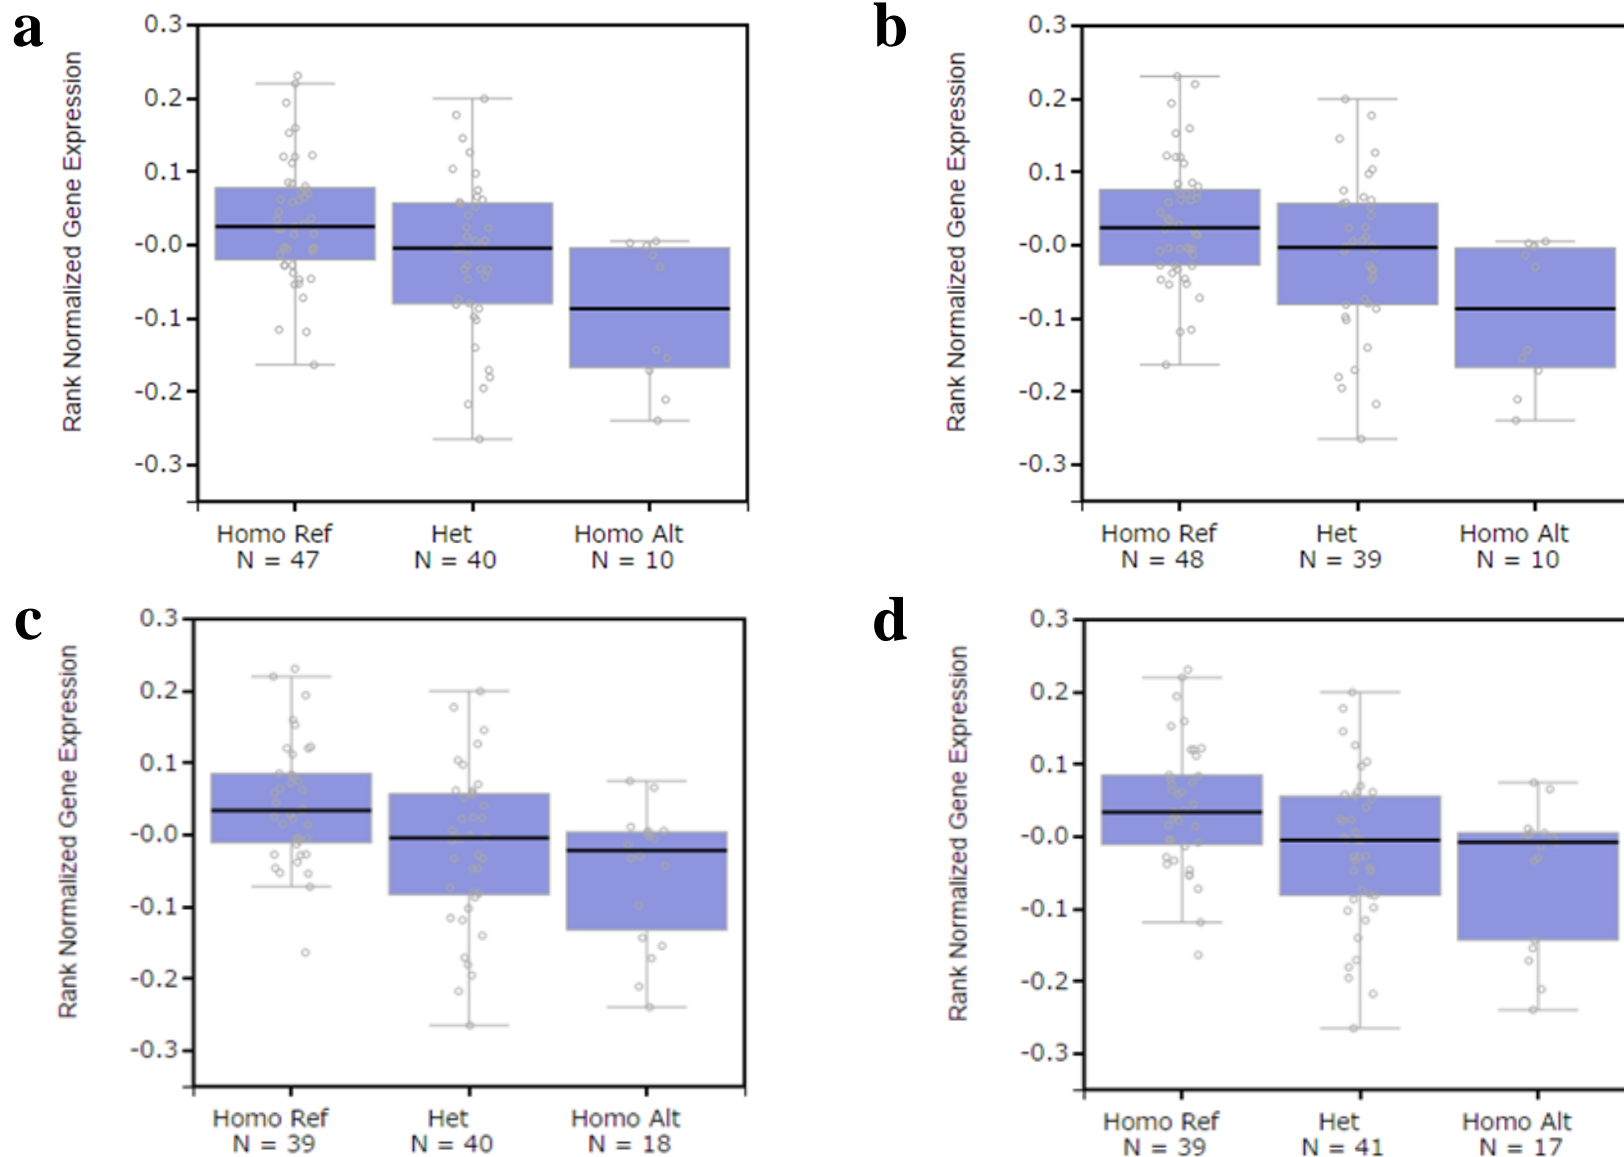

**Supplemental Figure 14. LINC01370 expression from public databases**

(a) GTEx. LINC01370 (RP11-101E14.2) expression values are shown in RPKM (reads per kilobase of transcript per million mapped reads). (b) FANTOM5. Top 10 CAGE expression of LINC01370 (p1@ENST00000432633). Both databases were accessed 2017 Feb. 21.

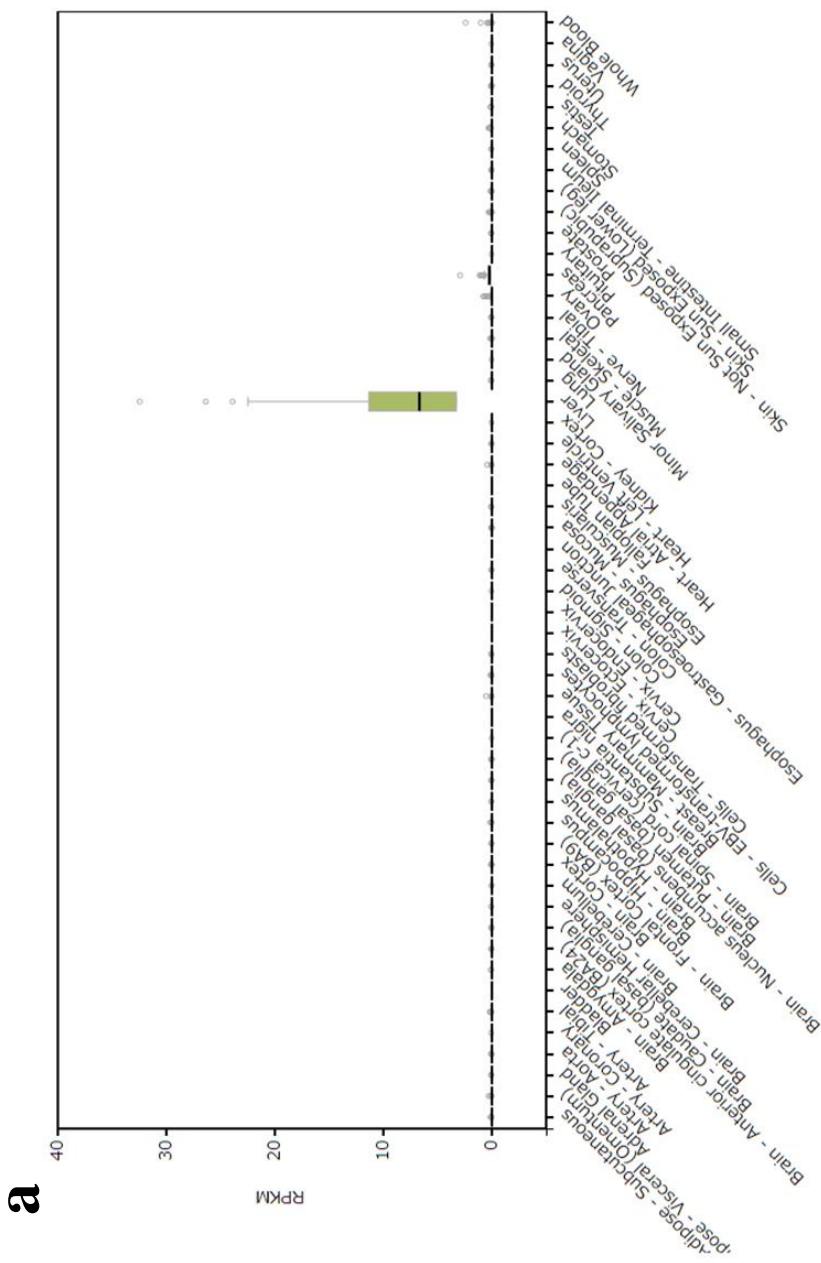

**b**

|                                                                                |       |
|--------------------------------------------------------------------------------|-------|
| Hepatocyte, donor2.CNhs12349.11603-12011                                       | 12.78 |
| liver, adult, pool1.CNhs10624.10018-101C9                                      | 9.53  |
| Hepatocyte, donor3.CNhs12626.11684-12211                                       | 9.45  |
| Hepatocyte, donor1.CNhs12340.11523-11912                                       | 8.87  |
| liver, fetal, pool1.CNhs11798.10086-102B5                                      | 1.33  |
| stomach, fetal, donor1.CNhs11771.10062-101H8                                   | 0.73  |
| SABiosciences XpressRef Human Universal Total RNA, pool1.CNhs10610.10002-101A5 | 0.62  |
| Universal RNA - Human Normal Tissues Biochain, pool1.CNhs10612.10007-101B4     | 0.56  |
| keratoacanthoma cell line:HKA-1.CNhs11880.10791-110H8                          | 0.34  |
| ovary, adult, pool1.CNhs10626.10020-101D2                                      | 0.08  |



### Supplemental Figure 15. Conditional analysis adjusting for rs671 genotyped data on the 12q24 locus

The regional association plots before (a, c) and after (b, d) adjusting for rs671 genotyped data on the imputation analysis for idiopathic and alcohol-associated osteonecrosis of the femoral head, respectively. In both analyses, the significant association of the 12q24 locus (a, c) disappeared after adjusting (b, d). The red line represented the threshold of genome-wide significance ( $P = 5 \times 10^{-8}$ ). The color intensity reflected the extent of linkage disequilibrium index ( $r^2$ ) with rs3858704 (in purple). Estimated recombination rates from the hg19/1000 Genomes Project Nov 2014 East Asian reference were shown as light-blue lines.

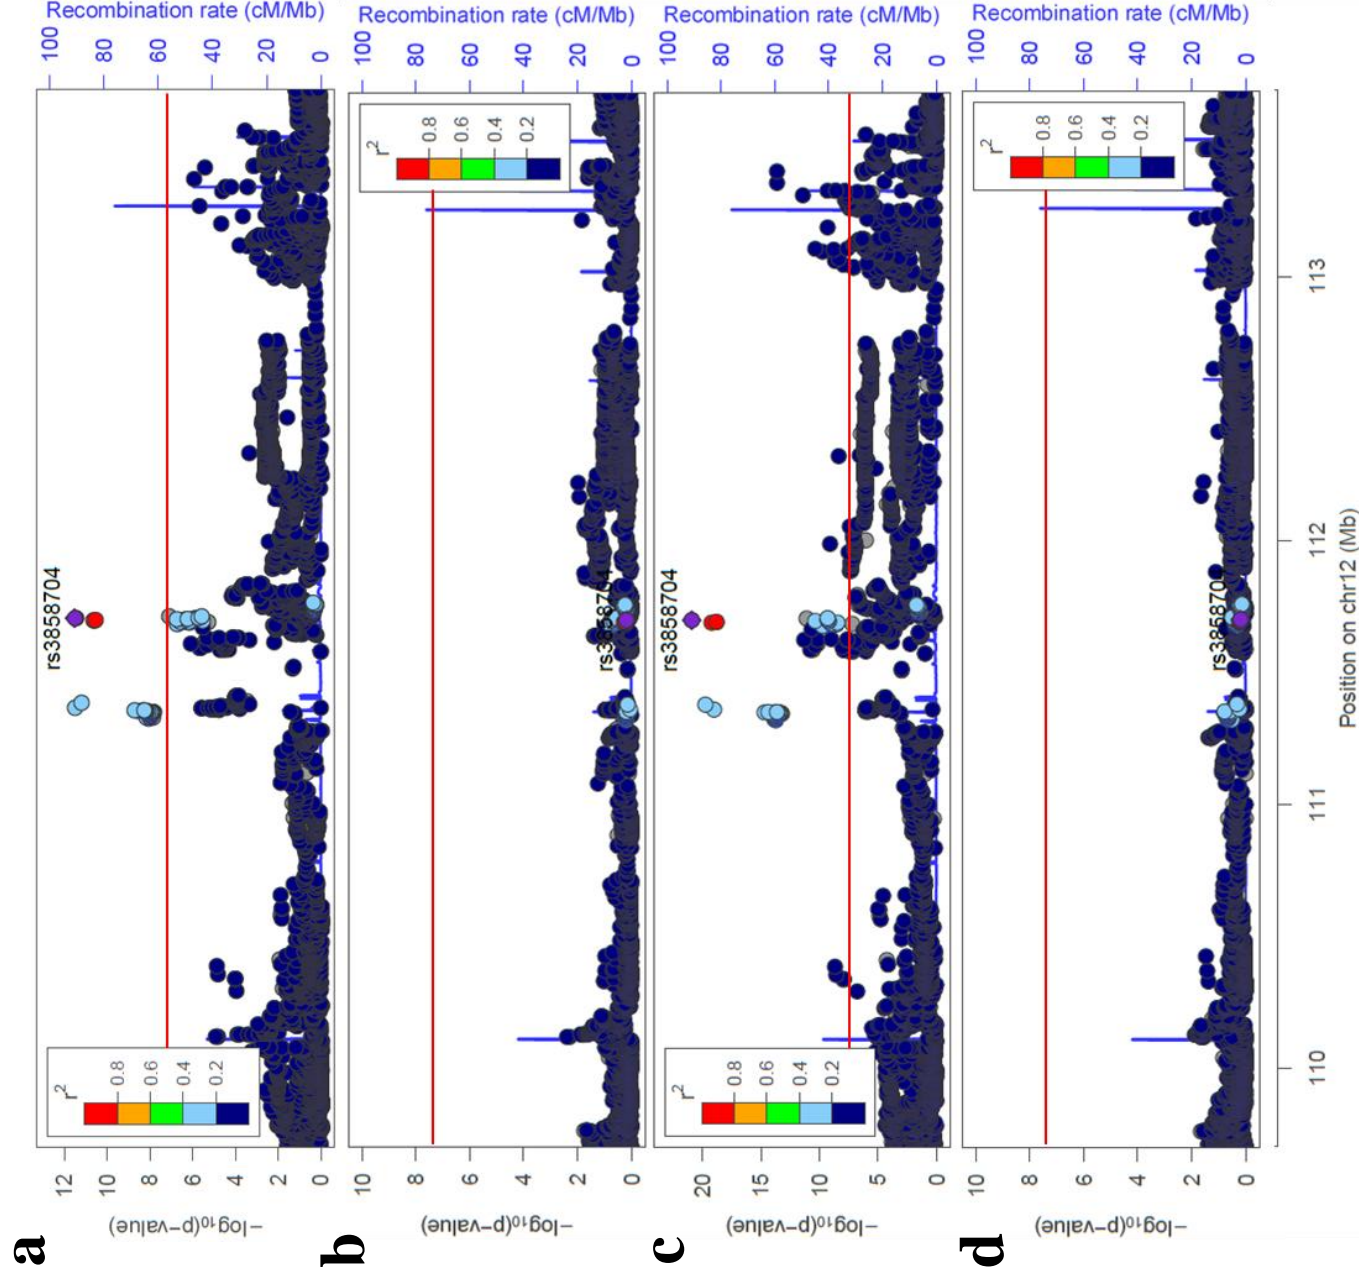

## Supplemental Figure 16. Regional association plots of four loci which were previously reported to be associated with steroid-associated osteonecrosis of the femoral head in acute lymphoid leukemia

The association results for steroid-associated osteonecrosis of the femoral head: **(a)** 1q32.3 (target SNP: rs1891059), **(b)** 8q13.1 (rs141059755), **(c)** 9q31.1 (rs10989692), **(d)** 20q13.31 (rs79085477). No loci showed significant associations in our samples. The red line represented the threshold of genome-wide significance ( $P = 5 \times 10^{-8}$ ). Light-blue lines showed estimated recombination rates from the hg19/1000 Genomes Project Nov 2014 East Asian reference. The yellow box represented linkage disequilibrium (LD) block surrounded by distinct peak of recombination rate. The color intensity reflected the extent of LD index ( $r^2$ ) with the top SNP in LD block or target SNP (in purple). The longitudinal purple line represented the position of target SNP in each locus. There were no genotyped or imputation data about rs1891059 in 1q32.3 **(a)** and rs141059755 in 8q13.1 **(b)**.

**a**

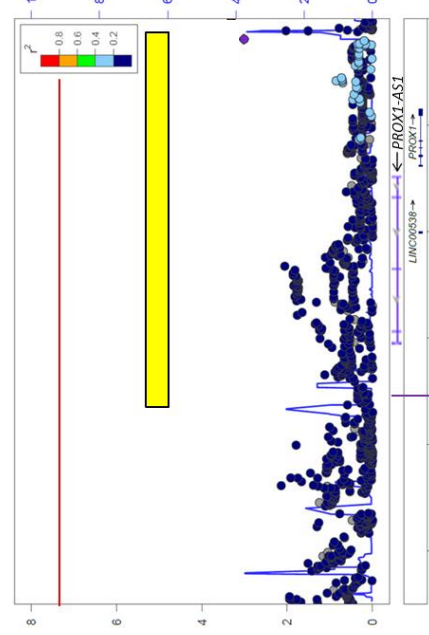

**b**

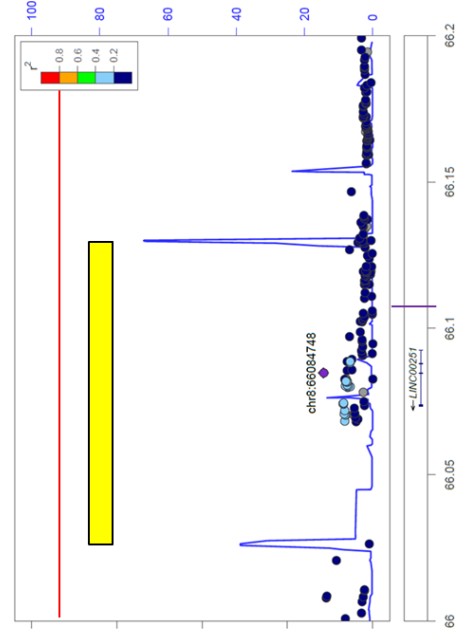

**c**

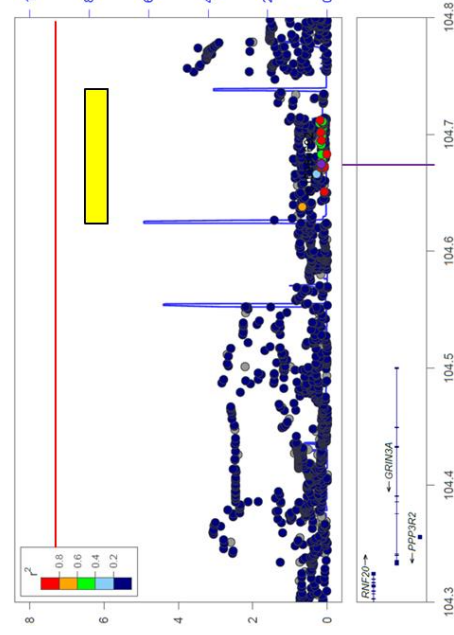

**d**

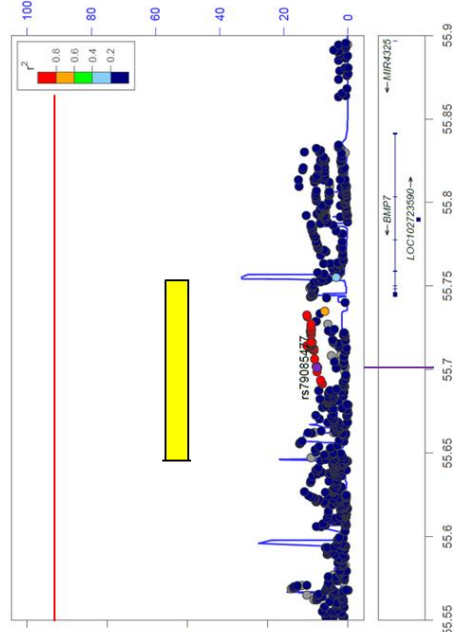

**Supplemental Table 1. Sample quality control for GWAS**

|                                | IONFH | BBJ    | Total  |
|--------------------------------|-------|--------|--------|
| Recruited                      | 1,602 | 60,000 | 61,602 |
| Excluded                       | 55    | 897    | 952    |
| Call rate < 98%                | 3     | 0      | 3      |
| Close relatedness*             | 5     | 889    | 894    |
| Outlier from East Asia cluster | 4     | 0      | 4      |
| Gender mismatch                | 2     | 8      | 10     |
| With past history of BMT       | 41    | 0      | 41     |
| Included                       | 1,547 | 59,103 | 60,650 |

\*Within third-degree relatedness. IONFH: idiopathic osteonecrosis of the femoral head, BBJ: BioBank Japan, BMT: bone marrow transplantation.

**Supplemental Table 2. SNPs with genome-wide significance in the GWAS for idiopathic osteonecrosis of the femoral head**

| SNP        | Chromosome | Cytoband | Position (bp) | Risk allele frequency |         | <i>P</i> *             | Odds ratio | 95% CI |       |
|------------|------------|----------|---------------|-----------------------|---------|------------------------|------------|--------|-------|
|            |            |          |               | Case                  | Control |                        |            | Lower  | Upper |
| rs10774610 |            |          | 111340243     | 0.820                 | 0.782   | $8.71 \times 10^{-9}$  | 1.31       | 1.20   | 1.44  |
| rs3782889  | 12         | 12q24.11 | 111350655     | 0.822                 | 0.785   | $1.29 \times 10^{-8}$  | 1.31       | 1.20   | 1.44  |
| rs2301610  |            |          | 111353556     | 0.824                 | 0.786   | $6.14 \times 10^{-9}$  | 1.32       | 1.20   | 1.45  |
| rs4766566  |            | 12q24.12 | 111706877     | 0.727                 | 0.673   | $4.53 \times 10^{-12}$ | 1.33       | 1.23   | 1.44  |
| rs13042600 |            |          | 38442513      | 0.611                 | 0.563   | $4.73 \times 10^{-8}$  | 1.23       | 1.14   | 1.32  |
| rs211841   |            |          | 38474802      | 0.453                 | 0.400   | $3.91 \times 10^{-10}$ | 1.26       | 1.17   | 1.35  |
| rs211840   |            |          | 38474881      | 0.453                 | 0.400   | $2.14 \times 10^{-10}$ | 1.26       | 1.17   | 1.36  |
| rs211835   |            |          | 38478566      | 0.501                 | 0.449   | $4.66 \times 10^{-10}$ | 1.26       | 1.17   | 1.35  |
| rs10211813 | 20         | 20q12    | 38487490      | 0.668                 | 0.609   | $4.69 \times 10^{-11}$ | 1.29       | 1.20   | 1.39  |
| rs11699371 |            |          | 38538542      | 0.380                 | 0.333   | $2.38 \times 10^{-8}$  | 1.23       | 1.15   | 1.33  |
| rs6065171  |            |          | 38538768      | 0.567                 | 0.503   | $4.38 \times 10^{-13}$ | 1.30       | 1.21   | 1.40  |
| rs2145943  |            |          | 38563245      | 0.640                 | 0.574   | $4.05 \times 10^{-13}$ | 1.32       | 1.22   | 1.42  |
| rs6129447  |            |          | 38566077      | 0.576                 | 0.512   | $6.83 \times 10^{-13}$ | 1.30       | 1.21   | 1.40  |

\**P*-value of genotyped SNPs was calculated by logistic covariate analysis (gender and top 10 principal component scores were used as covariate). CI: confidence interval.

**Supplemental Table 3. Top 10 results of eQTL analysis for all combinations of candidate genes, genome-wide significant SNPs and tissues available in GTEx**

| Gene             | SNP               | Tissue/Cell             | $P_{\text{GWAS}}$              | $P_{\text{eQTL}}$ | Effect Size  |
|------------------|-------------------|-------------------------|--------------------------------|-------------------|--------------|
| <i>LINC01370</i> | <b>rs62212405</b> | <b>Liver</b>            | <b>6.30 x 10<sup>-10</sup></b> | <b>0.00018</b>    | <b>-0.45</b> |
| <i>LINC01370</i> | <b>rs2208649</b>  | <b>Liver</b>            | <b>4.83 x 10<sup>-10</sup></b> | <b>0.00024</b>    | <b>-0.44</b> |
| <i>LINC01370</i> | <b>rs2224539</b>  | <b>Liver</b>            | <b>1.14 x 10<sup>-13</sup></b> | <b>0.00049</b>    | <b>-0.37</b> |
| <i>LINC01370</i> | <b>rs2145943</b>  | <b>Liver</b>            | <b>4.27 x 10<sup>-13</sup></b> | <b>0.0011</b>     | <b>-0.36</b> |
| <i>MAFB</i>      | rs2208649         | Lung                    | 4.83 x 10 <sup>-10</sup>       | 0.0012            | -0.17        |
| <i>DHX35</i>     | rs396182          | Brain (Hippocampus)     | 1.97 x 10 <sup>-8</sup>        | 0.0012            | 0.49         |
| <i>MAFB</i>      | rs6028703         | Transformed fibroblasts | 7.63 x 10 <sup>-13</sup>       | 0.0018            | -0.14        |
| <i>LINC01370</i> | <b>rs8119989</b>  | <b>Liver</b>            | <b>2.88 x 10<sup>-8</sup></b>  | <b>0.0020</b>     | <b>-0.34</b> |
| <i>LINC01370</i> | <b>rs12624742</b> | <b>Liver</b>            | <b>2.04 x 10<sup>-8</sup></b>  | <b>0.0024</b>     | <b>-0.34</b> |
| <i>LINC01370</i> | <b>rs4812412</b>  | <b>Liver</b>            | <b>2.09 x 10<sup>-8</sup></b>  | <b>0.0024</b>     | <b>-0.34</b> |

Results related to *LINC01370* were highlighted in bold.  $P_{\text{GWAS}}$ :  $P$ -value of GWAS after imputation for idiopathic osteonecrosis of the femoral head.  $P_{\text{eQTL}}$ :  $P$ -value of eQTL (expression quantitative trait locus) analysis. eQTL analysis was performed by using GTEx (accessed 2017 Feb. 21).

**Supplemental Table 4. Top 10 results of Gene ontology analysis by LncRNA2Function**

| Gene ontology term name                       | Frequency (%)     |                | <i>P</i> -value          |                          |
|-----------------------------------------------|-------------------|----------------|--------------------------|--------------------------|
|                                               | Background        | Sample         | Uncorrected              | Corrected                |
| <i>Cellular component</i>                     |                   |                |                          |                          |
| Extracellular region                          | 2120/20447 (10.4) | 131/391 (33.5) | 5.84 x 10 <sup>-36</sup> | 2.28 x 10 <sup>-32</sup> |
| Extracellular space                           | 841/20447 (4.11)  | 81/391 (20.7)  | 2.11 x 10 <sup>-34</sup> | 7.33 x 10 <sup>-31</sup> |
| Extracellular region part                     | 1130/20447 (5.53) | 82/391 (21.0)  | 3.18 x 10 <sup>-26</sup> | 4.52 x 10 <sup>-23</sup> |
| <b>High-density lipoprotein particle</b>      | 26/20447 (0.13)   | 18/391 (4.60)  | 1.08 x 10 <sup>-25</sup> | 1.46 x 10 <sup>-22</sup> |
| <b>Plasma lipoprotein particle</b>            | 38/20447 (0.19)   | 20/391 (5.12)  | 6.46 x 10 <sup>-25</sup> | 8.40 x 10 <sup>-22</sup> |
| <b>Protein-lipid complex</b>                  | 39/20447 (0.19)   | 20/391 (5.12)  | 1.30 x 10 <sup>-24</sup> | 1.63 x 10 <sup>-21</sup> |
| Endoplasmic reticulum part                    | 926/20447 (4.53)  | 68/391 (17.4)  | 5.78 x 10 <sup>-22</sup> | 5.15 x 10 <sup>-19</sup> |
| Endoplasmic reticulum                         | 1311/20447 (6.41) | 77/391 (19.7)  | 5.04 x 10 <sup>-19</sup> | 3.58 x 10 <sup>-16</sup> |
| <b>Triglyceride-rich lipoprotein particle</b> | 21/20447 (0.10)   | 13/391 (3.32)  | 6.65 x 10 <sup>-18</sup> | 3.77 x 10 <sup>-15</sup> |
| <b>Very-low-density lipoprotein particle</b>  | 21/20447 (0.10)   | 13/391 (3.32)  | 6.65 x 10 <sup>-18</sup> | 3.77 x 10 <sup>-15</sup> |
| <i>Biological process</i>                     |                   |                |                          |                          |
| Single-organism metabolic process             | 2653/20447 (13.0) | 179/391 (45.8) | 4.44 x 10 <sup>-58</sup> | 1.38 x 10 <sup>-53</sup> |
| Small molecule metabolic process              | 2193/20447 (10.7) | 162/391 (41.4) | 7.67 x 10 <sup>-57</sup> | 1.20 x 10 <sup>-52</sup> |
| <b>Lipid metabolic process</b>                | 1051/20447 (5.14) | 107/391 (27.4) | 1.72 x 10 <sup>-48</sup> | 1.79 x 10 <sup>-44</sup> |
| Carboxylic acid metabolic process             | 787/20447 (3.85)  | 88/391 (22.5)  | 1.13 x 10 <sup>-42</sup> | 8.84 x 10 <sup>-39</sup> |
| Organic acid metabolic process                | 911/20447 (4.46)  | 93/391 (23.8)  | 7.42 x 10 <sup>-42</sup> | 4.64 x 10 <sup>-38</sup> |
| <b>Steroid metabolic process</b>              | 244/20447 (1.19)  | 53/391 (13.6)  | 1.70 x 10 <sup>-40</sup> | 8.87 x 10 <sup>-37</sup> |
| Oxoacid metabolic process                     | 894/20447 (4.37)  | 89/391 (22.8)  | 4.33 x 10 <sup>-39</sup> | 1.93 x 10 <sup>-35</sup> |
| Xenobiotic metabolic process                  | 149/20447 (0.73)  | 38/391 (9.72)  | 5.03 x 10 <sup>-32</sup> | 1.57 x 10 <sup>-28</sup> |
| Cellular response to xenobiotic stimulus      | 150/20447 (0.73)  | 38/391 (9.72)  | 6.62 x 10 <sup>-32</sup> | 1.88 x 10 <sup>-28</sup> |
| Response to xenobiotic stimulus               | 152/20447 (0.74)  | 38/391 (9.72)  | 1.14 x 10 <sup>-31</sup> | 2.97 x 10 <sup>-28</sup> |

The terms containing ‘lipoprotein’, ‘lipid’ or ‘steroid’ were highlighted in bold. *P*-value of each term was calculated by hypergeometric test and all *P*-values were corrected by the Benjamini-Yekutieli method.

**Supplemental Table 5. Top 30 results of pathway analysis by LncRNA2Function**

| Pathway      |                                                        | Frequency (%)     |                | <i>P</i> -value          |                          |
|--------------|--------------------------------------------------------|-------------------|----------------|--------------------------|--------------------------|
| Database     | Name                                                   | Background        | Sample         | Uncorrected              | Corrected                |
| Reactome     | Metabolism                                             | 1394/20447 (6.82) | 129/391 (33.0) | 1.18 x 10 <sup>-54</sup> | 1.19 x 10 <sup>-51</sup> |
| KEGG         | Metabolic pathways                                     | 1256/20447 (6.14) | 110/391 (28.1) | 1.61 x 10 <sup>-43</sup> | 8.14 x 10 <sup>-41</sup> |
| KEGG         | Retinol metabolism                                     | 69/20447 (0.34)   | 29/391 (7.42)  | 6.11 x 10 <sup>-32</sup> | 2.06 x 10 <sup>-29</sup> |
| KEGG         | <b>Complement and coagulation cascades</b>             | 87/20447 (0.43)   | 30/391 (7.67)  | 6.68 x 10 <sup>-30</sup> | 1.69 x 10 <sup>-27</sup> |
| EHMN         | Androgen and estrogen biosynthesis and metabolism      | 90/20447 (0.44)   | 30/391 (7.67)  | 2.18 x 10 <sup>-29</sup> | 4.40 x 10 <sup>-27</sup> |
| Reactome     | Biological oxidations                                  | 151/20447 (0.74)  | 36/391 (9.21)  | 2.97 x 10 <sup>-29</sup> | 4.99 x 10 <sup>-27</sup> |
| KEGG         | <b>Drug metabolism - cytochrome P450</b>               | 76/20447 (0.37)   | 28/391 (7.16)  | 6.27 x 10 <sup>-29</sup> | 9.05 x 10 <sup>-27</sup> |
| KEGG         | <b>Metabolism of xenobiotics by cytochrome P450</b>    | 87/20447 (0.43)   | 29/391 (7.42)  | 1.91 x 10 <sup>-28</sup> | 2.41 x 10 <sup>-26</sup> |
| KEGG         | Chemical carcinogenesis                                | 86/20447 (0.42)   | 28/391 (7.16)  | 3.58 x 10 <sup>-27</sup> | 4.02 x 10 <sup>-25</sup> |
| EHMN         | Tyrosine metabolism                                    | 113/20447 (0.55)  | 30/391 (7.67)  | 4.63 x 10 <sup>-26</sup> | 4.68 x 10 <sup>-24</sup> |
| EHMN         | Xenobiotics metabolism                                 | 54/20447 (0.26)   | 23/391 (5.88)  | 9.90 x 10 <sup>-26</sup> | 9.09 x 10 <sup>-24</sup> |
| Reactome     | Metabolism of amino acids and derivatives              | 159/20447 (0.78)  | 32/391 (8.18)  | 1.18 x 10 <sup>-23</sup> | 9.97 x 10 <sup>-22</sup> |
| Wikipathways | Metapathway biotransformation                          | 190/20447 (0.93)  | 34/391 (8.70)  | 2.64 x 10 <sup>-23</sup> | 2.05 x 10 <sup>-21</sup> |
| EHMN         | Linoleate metabolism                                   | 75/20447 (0.37)   | 24/391 (6.14)  | 2.99 x 10 <sup>-23</sup> | 2.16 x 10 <sup>-21</sup> |
| Wikipathways | <b>Cytochrome P450</b>                                 | 68/20447 (0.33)   | 23/391 (5.88)  | 5.73 x 10 <sup>-23</sup> | 3.86 x 10 <sup>-21</sup> |
| Wikipathways | <b>Complement and coagulation cascades</b>             | 60/20447 (0.29)   | 22/391 (5.63)  | 6.32 x 10 <sup>-23</sup> | 3.99 x 10 <sup>-21</sup> |
| EHMN         | Leukotriene metabolism                                 | 102/20447 (0.50)  | 26/391 (6.65)  | 3.06 x 10 <sup>-22</sup> | 1.82 x 10 <sup>-20</sup> |
| Reactome     | Phase 1 - Functionalization of compounds               | 74/20447 (0.36)   | 23/391 (5.88)  | 5.31 x 10 <sup>-22</sup> | 2.98 x 10 <sup>-20</sup> |
| KEGG         | Drug metabolism - other enzymes                        | 53/20447 (0.26)   | 20/391 (5.12)  | 2.99 x 10 <sup>-21</sup> | 1.59 x 10 <sup>-19</sup> |
| Reactome     | Xenobiotics                                            | 15/20447 (0.07)   | 13/391 (3.32)  | 3.80 x 10 <sup>-21</sup> | 1.92 x 10 <sup>-19</sup> |
| EHMN         | <b>C21-steroid hormone biosynthesis and metabolism</b> | 62/20447 (0.30)   | 21/391 (5.37)  | 4.31 x 10 <sup>-21</sup> | 2.07 x 10 <sup>-19</sup> |
| Reactome     | <b>Cytochrome P450 - arranged by substrate type</b>    | 56/20447 (0.27)   | 20/391 (5.12)  | 1.10 x 10 <sup>-20</sup> | 5.07 x 10 <sup>-19</sup> |
| INOH         | Tryptophan degradation                                 | 66/20447 (0.32)   | 21/391 (5.37)  | 1.94 x 10 <sup>-20</sup> | 8.53 x 10 <sup>-19</sup> |
| Reactome     | <b>Metabolism of lipids and lipoproteins</b>           | 496/20447 (2.43)  | 47/391 (12.0)  | 1.06 x 10 <sup>-19</sup> | 4.46 x 10 <sup>-18</sup> |
| Wikipathways | Phase 1 - Functionalization of compounds               | 55/20447 (0.27)   | 19/391 (4.86)  | 2.16 x 10 <sup>-19</sup> | 8.74 x 10 <sup>-18</sup> |
| PharmGKB     | Phenytoin pathway, Pharmacokinetics                    | 20/20447 (0.10)   | 13/391 (3.32)  | 2.58 x 10 <sup>-18</sup> | 1.00 x 10 <sup>-16</sup> |
| PID          | <b>Chylomicron-mediated lipid transport</b>            | 16/20447 (0.08)   | 12/391 (3.07)  | 3.44 x 10 <sup>-18</sup> | 1.24 x 10 <sup>-16</sup> |
| PharmGKB     | Carbamazepine pathway, Pharmacokinetics                | 16/20447 (0.08)   | 12/391 (3.07)  | 3.44 x 10 <sup>-18</sup> | 1.24 x 10 <sup>-16</sup> |
| PID          | Xenobiotics                                            | 13/20447 (0.06)   | 11/391 (2.81)  | 8.20 x 10 <sup>-18</sup> | 2.86 x 10 <sup>-16</sup> |
| Wikipathways | <b>Statin pathway</b>                                  | 33/20447 (0.16)   | 15/391 (3.84)  | 9.71 x 10 <sup>-18</sup> | 3.27 x 10 <sup>-16</sup> |

The plausible pathways for idiopathic osteonecrosis of the femoral head were highlighted in bold. *P*-value of each term was calculated by hypergeometric test and all *P*-values were corrected by the Benjamini-Hochberg method.

**Supplemental Table 6. Top 10 results of Gene ontology and KEGG pathway analysis by Co-LncRNA**

| Term and pathway                                             | Number of Genes |     |         | Enrichment <i>P</i> value |                         |                         |
|--------------------------------------------------------------|-----------------|-----|---------|---------------------------|-------------------------|-------------------------|
|                                                              | WP              | CE  | Overlap | Nominal                   | B.H.                    | Bonf.                   |
| Gene ontology (Biological process)                           |                 |     |         |                           |                         |                         |
| <b>Cellular lipid metabolic process</b>                      | 150             | 143 | 7       | 4.44 x 10 <sup>-7</sup>   | 1.97 x 10 <sup>-5</sup> | 2.77 x 10 <sup>-4</sup> |
| Translational initiation                                     | 119             | 143 | 5       | 1.76 x 10 <sup>-5</sup>   | 3.02 x 10 <sup>-4</sup> | 0.011                   |
| <b>Fatty acid beta-oxidation</b>                             | 36              | 143 | 3       | 2.12 x 10 <sup>-5</sup>   | 3.07 x 10 <sup>-4</sup> | 0.013                   |
| Viral transcription                                          | 82              | 143 | 4       | 3.65 x 10 <sup>-5</sup>   | 4.96 x 10 <sup>-4</sup> | 0.022                   |
| Translational termination                                    | 84              | 143 | 4       | 4.10 x 10 <sup>-5</sup>   | 5.13 x 10 <sup>-4</sup> | 0.025                   |
| Viral life cycle                                             | 93              | 143 | 4       | 6.69 x 10 <sup>-5</sup>   | 5.49 x 10 <sup>-4</sup> | 0.041                   |
| Translational elongation                                     | 93              | 143 | 4       | 6.69 x 10 <sup>-5</sup>   | 5.49 x 10 <sup>-4</sup> | 0.041                   |
| mRNA metabolic process                                       | 225             | 143 | 6       | 7.81 x 10 <sup>-5</sup>   | 6.17 x 10 <sup>-4</sup> | 0.048                   |
| SRP-dependent co-translational protein targeting to membrane | 107             | 143 | 4       | 1.30 x 10 <sup>-4</sup>   | 7.59 x 10 <sup>-4</sup> | 0.081                   |
| RNA metabolic process                                        | 246             | 143 | 6       | 1.35 x 10 <sup>-4</sup>   | 7.78 x 10 <sup>-4</sup> | 0.084                   |
| KEGG pathway                                                 |                 |     |         |                           |                         |                         |
| <b>Fatty acid metabolism</b>                                 | 42              | 143 | 4       | 1.31 x 10 <sup>-6</sup>   | 1.16 x 10 <sup>-4</sup> | 1.16 x 10 <sup>-4</sup> |
| PPAR signaling pathway                                       | 69              | 143 | 4       | 1.57 x 10 <sup>-5</sup>   | 6.95 x 10 <sup>-4</sup> | 0.001                   |
| Ribosome                                                     | 88              | 143 | 4       | 5.14 x 10 <sup>-5</sup>   | 0.001                   | 0.004                   |
| Non small cell lung cancer                                   | 54              | 143 | 3       | 1.06 x 10 <sup>-4</sup>   | 0.001                   | 0.009                   |
| Glioma                                                       | 65              | 143 | 3       | 2.20 x 10 <sup>-4</sup>   | 0.002                   | 0.019                   |
| MAPK signaling pathway                                       | 267             | 143 | 6       | 2.24 x 10 <sup>-4</sup>   | 0.002                   | 0.019                   |
| Pancreatic cancer                                            | 70              | 143 | 3       | 2.93 x 10 <sup>-4</sup>   | 0.002                   | 0.025                   |
| Melanoma                                                     | 71              | 143 | 3       | 3.09 x 10 <sup>-4</sup>   | 0.002                   | 0.027                   |
| Chronic myeloid leukemia                                     | 73              | 143 | 3       | 3.44 x 10 <sup>-4</sup>   | 0.002                   | 0.030                   |
| Peroxisome                                                   | 78              | 143 | 3       | 4.43 x 10 <sup>-4</sup>   | 0.003                   | 0.039                   |

The plausible pathways for idiopathic osteonecrosis of the femoral head were highlighted in bold. WP: genes analyzed within pathway, CE: co-expressed genes with LINC01370, B.H.: corrected by the Benjamini & Hochberg method, Bonf.: corrected by the Bonferroni method.



**Supplemental table 7. Biological pathways or gene sets significantly associated with idiopathic osteonecrosis of the femoral head identified by MAGENTA**

| Database  | Pathway or gene set                         | Analyzed genes | 95% cutoff (Top 5%)     |                       |                |                |
|-----------|---------------------------------------------|----------------|-------------------------|-----------------------|----------------|----------------|
|           |                                             |                | Nominal <i>P</i> -value | FDR                   | Expected genes | Observed genes |
| GOTERM    | Positive regulation of B cell proliferation | 20             | $2.50 \times 10^{-5}$   | $2.65 \times 10^{-2}$ | 1              | 7              |
| Ingenuity | Chemokine signaling                         | 21             | $4.00 \times 10^{-4}$   | $1.45 \times 10^{-2}$ | 1              | 6              |
| Ingenuity | Fc epsilon RI signaling                     | 17             | $1.00 \times 10^{-3}$   | $1.63 \times 10^{-2}$ | 1              | 5              |
| Ingenuity | Neuregulin signaling                        | 25             | $6.80 \times 10^{-3}$   | $3.86 \times 10^{-2}$ | 1              | 5              |
| Ingenuity | <b>VEGF signaling</b>                       | 16             | $7.60 \times 10^{-3}$   | $4.48 \times 10^{-2}$ | 1              | 4              |
| Ingenuity | Cell cycle G1/S checkpoint regulation       | 17             | $8.80 \times 10^{-3}$   | $4.19 \times 10^{-2}$ | 1              | 4              |
| Ingenuity | JAK-STAT signaling                          | 10             | $1.05 \times 10^{-2}$   | $3.91 \times 10^{-2}$ | 1              | 3              |

The plausible pathways for idiopathic osteonecrosis of the femoral head were highlighted in bold. FDR: false discovery rate

**Supplemental Table 8. rs671 genotype of the subjects**

| Subject                                     | Number | Genotype count |        |        | Allele frequency |       | Heterogeneity |           |                       |
|---------------------------------------------|--------|----------------|--------|--------|------------------|-------|---------------|-----------|-----------------------|
|                                             |        | AA             | AG     | GG     | A                | G     | Observed      | Estimated | $P_{HWE}^*$           |
| IONFH                                       | 1,547  | 67             | 436    | 1,041  | 0.185            | 0.815 | 0.282         | 0.301     | 0.018                 |
| <i>Stratification based on risk factors</i> |        |                |        |        |                  |       |               |           |                       |
| Alcohol-associated                          | 351    | 0              | 29     | 322    | 0.041            | 0.959 | 0.083         | 0.079     | 1                     |
| Steroid-associated                          | 1,058  | 62             | 359    | 635    | 0.229            | 0.771 | 0.340         | 0.353     | 0.256                 |
| Neither-associated                          | 132    | 5              | 45     | 81     | 0.210            | 0.790 | 0.344         | 0.332     | 0.798                 |
| BioBank Japan                               | 59,103 | 3,900          | 21,666 | 33,493 | 0.250            | 0.751 | 0.367         | 0.375     | $8.99 \times 10^{-7}$ |
| Heavy alcohol drinker <sup>#</sup>          | 3,647  | 3              | 517    | 3,124  | 0.072            | 0.928 | 0.142         | 0.133     | $5.15 \times 10^{-6}$ |

IONFH: idiopathic osteonecrosis of the femoral head,  $P_{HWE}$ :  $P$ -value of Hardy-Weinberg equilibrium. \*The threshold in this study was  $1 \times 10^{-6}$ . <sup>#</sup>400 ml/week or more pure ethanol consumption.

**Supplemental Table 9. Association of rs671 in IONFH**

|                                                     | Case  | Control | Risk allele frequency |         | <i>P</i>                 | Odds ratio | 95% CI |       |
|-----------------------------------------------------|-------|---------|-----------------------|---------|--------------------------|------------|--------|-------|
|                                                     |       |         | Case                  | Control |                          |            | Lower  | Upper |
| IONFH                                               | 1,547 | 59,103  | 0.815                 | 0.750   | 6.40 x 10 <sup>-20</sup> | 1.54       | 1.40   | 1.69  |
| <i>Stratified analysis based on risk factors</i>    |       |         |                       |         |                          |            |        |       |
| Alcohol-associated                                  | 351   | 59,103  | 0.959                 | 0.750   | 3.26 x 10 <sup>-28</sup> | 8.12       | 5.59   | 11.8  |
| Steroid-associated                                  | 1,058 | 59,103  | 0.771                 | 0.750   | 0.00304                  | 1.17       | 1.05   | 1.30  |
| Neither-associated                                  | 132   | 59,103  | 0.790                 | 0.750   | 0.0501                   | 1.35       | 1.00   | 1.82  |
| <i>Stratified analysis based on alcohol intake*</i> |       |         |                       |         |                          |            |        |       |
| Alcohol-associated                                  | 351   | 3,647   | 0.959                 | 0.928   | 0.00127                  | 1.91       | 1.29   | 2.84  |

IONFH: idiopathic osteonecrosis of the femoral head, CI: confidence interval. *P*-value was calculated by logistic covariate analysis (Gender and top 10 principal components were used as covariate). \*Controls were matched for alcohol-drinking history (400 ml or more ethanol consumption per week).

**Supplemental Table 10. Association in our GWAS of four SNPs reported in previous GWAS for steroid-associated osteonecrosis of the femoral head in children with acute lymphoblastic leukemia<sup>#</sup>**

| SNP         | Position         | Cytoband | Nearest gene     | Minor allele frequency in each ethnic group |       |       |       |       | <i>P</i> -value* |
|-------------|------------------|----------|------------------|---------------------------------------------|-------|-------|-------|-------|------------------|
|             |                  |          |                  | AFR                                         | AMR   | EUR   | SAS   | EAS   |                  |
| rs1891059   | chr1:213,946,009 | 1q32.3   | <i>PROX1-AS1</i> | 0.026                                       | 0.033 | 0.059 | 0.016 | 0     | No data          |
| rs141059755 | chr8:66,107,605  | 8q13.1   | <i>LINC00251</i> | 0.001                                       | 0.007 | 0.001 | 0     | 0     | No data          |
| rs10989692  | chr9:104,674,555 | 9q31.1   | <i>GRIN3A</i>    | 0.319                                       | 0.071 | 0.105 | 0.025 | 0.022 | 0.682            |
| rs79085477  | chr20:55,701,215 | 20q13.31 | <i>BMP7</i>      | 0.058                                       | 0.007 | 0.008 | 0.035 | 0.068 | 0.170            |

<sup>#</sup>Blood 2015 (ref. 25) and 2016 (ref. 26) by Karol *et al.*. \**P*-value in our GWAS after imputation for steroid-associated osteonecrosis of the femoral head. Allele frequency data were derived from 1000 Genomes Project Phase 3 (AFR: African, AMR: American, EUR: European, SAS: South Asian, EAS: East Asian).
